# Supplementary material
Source: Research Square preprint supplement (doi:10.21203/rs.3.rs-9242198/v1)
Supplement: Supplementary file 1 [file d32e38b03ee5ebb21eeada66.xlsx]

## Sheet: Table S1
	Supplementary Table S1. Identified variety‑specific bi‑allelic SNPs between four parental rice.
	#CHROM	POS	REF	ALT	QUAL	CATEGORY	NP	KS	IR26	T65	NPKS-1	NPKS-2	NPKS-3	Quad1-1	Quad1-2	Quad1-3	Quad1-4	Quad1-5	Quad1-6	Quad1-7	Quad2-1	Quad2-2	Quad2-3	Quad2-4	Quad2-5	Quad2-6	Quad2-7	Quad2-8
	chr01	42329729	T	C	715.166	NP specific	A	B	B	B	AH	BH	AH	BH	BH	H	BH	H	AH	BH	BH	AH	BH	BH	BH	BH	BH	BH
	chr02	5768678	A	G	3785.68	NP specific	A	B	B	B	H	H	H	H	H	H	BH	H	H	H	H	H	H	BH	H	H	H	H
	chr03	12501458	T	C	2415.58	NP specific	A	B	B	B	H	H	H	H	H	H	H	BH	H	B	H	H	H	H	H	H	H	H
	chr03	15094249	A	G	4669.44	NP specific	A	B	B	B	H	AH	H	H	H	H	H	H	H	H	H	H	H	H	H	H	H	H
	chr04	1724953	A	G	4424.69	NP specific	A	B	B	B	H	H	H	H	H	H	H	H	H	H	H	H	H	H	H	H	H	B
	chr04	5043766	C	A	3388.58	NP specific	A	BH	B	B	H	H	H	H	H	H	H	H	H	H	H	H	H	BH	H	H	H	B
	chr05	3012647	C	T	4178.41	NP specific	A	B	B	B	H	H	H	H	H	H	H	H	H	H	H	H	H	H	H	H	H	H
	chr05	14825646	A	G	4669.73	NP specific	A	B	B	B	H	H	H	H	H	H	H	H	H	H	H	H	H	H	H	H	H	H
	chr05	17391758	C	T	1827.4	NP specific	A	B	B	B	H	BH	H	BH	H	BH	BH	BH	BH	BH	BH	B	BH	BH	BH	H	BH	B
	chr06	23495503	A	G	4759.32	NP specific	A	B	B	B	H	H	H	H	H	H	H	H	H	H	H	H	H	H	H	H	H	H
	chr07	10791152	T	C	1068.59	NP specific	AH	B	B	B	H	AH	AH	BH	H	BH	H	H	H	H	H	H	H	H	H	H	H	H
	chr07	21324312	A	G	3192.81	NP specific	A	B	B	B	H	H	H	H	H	H	H	BH	BH	H	BH	H	H	H	H	H	H	H
	chr07	21324480	A	C	3089.84	NP specific	A	B	B	B	H	H	H	H	H	H	H	BH	H	H	BH	H	H	H	H	H	H	H
	chr10	22657613	C	G	5228.71	NP specific	A	B	B	B	B	H	H	H	H	H	H	H	H	H	H	H	H	BH	H	BH	H	H
	chr11	4597334	T	C	4181.16	NP specific	A	B	B	B	BH	BH	B	BH	B	BH	B	B	B	BH	B	B	BH	B	B	B	B	B
	chr11	4597352	G	T	4199.19	NP specific	A	B	B	B	BH	BH	B	BH	B	BH	B	B	B	BH	B	B	BH	B	B	B	B	B
	chr11	4597397	C	T	473.837	NP specific	A	B	B	B	BH	BH	B	BH	B	BH	B	B	B	BH	B	B	BH	B	B	B	B	B
	chr11	4597398	G	C	481.874	NP specific	A	B	B	B	BH	BH	B	BH	B	BH	B	B	B	BH	B	B	BH	B	B	B	B	B
	chr11	27579914	A	G	5178.76	NP specific	A	B	B	B	H	H	H	H	H	H	H	H	H	H	H	H	H	H	H	H	H	H
	chr01	2142299	T	C	1512.98	KS specific	A	BH	A	A	H	H	H	H	H	H	H	H	H	H	H	H	H	AH	H	H	AH	H
	chr01	2932159	C	A	1582.58	KS specific	A	B	A	A	H	H	H	H	A	H	H	AH	H	AH	H	H	H	H	H	H	H	AH
	chr01	5885568	T	A	1488.64	KS specific	A	B	A	A	H	H	H	H	H	H	H	AH	H	H	H	H	H	H	H	H	H	H
	chr01	5885622	G	T	1262.91	KS specific	A	B	A	A	H	H	H	H	H	H	H	AH	AH	H	H	H	H	H	H	H	H	H
	chr01	5889506	T	C	2243.86	KS specific	A	B	A	A	H	H	H	H	H	H	H	H	H	H	H	H	H	H	H	H	H	H
	chr01	5889614	T	C	1335.08	KS specific	A	B	A	A	H	H	H	H	H	H	H	H	H	H	H	H	H	H	H	H	H	H
	chr01	5889620	C	T	1469.47	KS specific	A	B	A	A	H	H	H	H	H	H	H	H	H	H	H	H	H	H	H	H	H	H
	chr01	6410951	A	G	3652.02	KS specific	A	B	A	A	H	H	H	H	H	H	H	H	H	H	H	H	H	H	H	H	H	H
	chr01	6410967	T	C	3653.17	KS specific	A	B	A	A	H	H	H	H	H	H	H	H	H	H	H	H	H	H	H	H	H	H
	chr01	6592069	G	A	4273.74	KS specific	A	B	A	A	H	H	H	H	H	H	H	H	H	H	H	H	H	H	H	H	H	H
	chr01	7823513	G	A	1815.9	KS specific	A	B	A	A	H	H	H	H	H	H	AH	H	H	H	H	H	AH	H	H	H	H	H
	chr01	7823547	C	T	1819.77	KS specific	A	B	A	A	H	H	H	H	H	H	AH	H	H	H	H	H	AH	H	H	H	H	H
	chr01	8312427	G	T	2359.16	KS specific	A	B	A	A	H	H	H	H	H	H	H	H	H	H	H	H	H	H	H	H	H	H
	chr01	8312459	C	T	2497.4	KS specific	A	B	A	A	H	H	H	H	H	H	H	H	H	H	H	H	H	H	H	H	H	H
	chr01	8408614	T	C	2341.18	KS specific	A	B	A	A	H	H	H	H	H	H	H	H	H	H	H	H	H	H	H	H	H	AH
	chr01	9313699	G	A	990.135	KS specific	A	B	A	A	H	H	H	AH	H	H	H	AH	H	H	AH	A	AH	H	H	H	H	AH
	chr01	9313776	A	T	1725.16	KS specific	A	B	A	A	H	H	H	AH	H	H	H	H	H	H	AH	A	AH	H	H	H	H	AH
	chr01	9313801	T	C	1713.04	KS specific	A	B	A	A	H	H	H	AH	H	H	H	H	H	H	AH	A	AH	H	H	H	H	AH
	chr01	9612928	T	C	407.574	KS specific	A	B	A	A	AH	H	H	A	AH	AH	AH	AH	AH	A	A	AH	AH	AH	AH	A	AH	AH
	chr01	13147974	C	T	366.151	KS specific	A	B	A	A	H	AH	AH	H	H	H	H	H	H	H	H	H	H	H	H	H	H	H
	chr01	13148030	G	A	850.086	KS specific	A	B	A	A	H	H	H	H	H	H	H	H	H	H	H	H	H	H	H	H	H	H
	chr01	13148059	G	A	471.835	KS specific	A	B	A	A	H	H	H	H	H	H	H	H	H	H	H	H	AH	H	H	H	H	H
	chr01	13325925	C	T	656.878	KS specific	A	B	A	A	AH	H	H	AH	AH	AH	AH	AH	H	AH	AH	AH	AH	AH	H	AH	AH	AH
	chr01	13325988	C	T	659.888	KS specific	AH	B	A	A	AH	H	H	AH	AH	AH	AH	AH	H	AH	AH	AH	AH	AH	H	AH	AH	AH
	chr01	13326008	G	A	640.896	KS specific	A	B	A	A	AH	H	H	AH	AH	AH	AH	AH	H	AH	AH	AH	AH	AH	H	AH	AH	AH
	chr01	14031926	G	A	2037.09	KS specific	A	B	A	A	H	H	H	H	H	H	H	H	H	H	H	H	H	H	H	H	H	H
	chr01	14334798	C	T	3205.83	KS specific	A	B	A	A	H	H	H	H	H	H	H	H	H	H	H	H	H	H	H	H	H	H
	chr01	17291693	G	A	500.372	KS specific	A	B	A	A	H	H	H	AH	AH	AH	AH	AH	AH	AH	AH	AH	AH	AH	AH	AH	AH	AH
	chr01	17795485	G	T	2318.62	KS specific	A	B	A	A	BH	BH	H	H	H	H	H	H	H	H	H	H	H	H	H	H	H	H
	chr01	17795547	C	T	2347.51	KS specific	A	B	A	A	BH	BH	H	H	H	H	H	H	H	H	H	H	H	H	H	H	H	H
	chr01	17795571	C	T	2320.94	KS specific	A	B	A	A	BH	BH	H	H	H	H	H	H	H	H	H	H	H	H	H	H	H	H
	chr01	17795626	C	T	2246.85	KS specific	A	B	AH	A	BH	BH	H	H	H	H	H	H	H	H	H	H	H	H	H	H	H	H
	chr01	17862476	T	A	1976.98	KS specific	A	B	A	A	H	H	H	H	H	H	H	H	H	H	H	H	H	H	H	H	H	H
	chr01	17862537	C	T	1858.56	KS specific	A	B	A	A	H	H	H	H	H	H	H	H	H	H	H	H	H	H	H	H	H	H
	chr01	17862541	G	T	1806.63	KS specific	A	B	A	A	H	H	H	H	H	H	H	H	H	H	H	H	H	H	H	H	H	H
	chr01	17862590	C	G	1712.93	KS specific	A	B	A	A	H	H	H	H	H	H	H	H	H	H	H	H	H	H	H	H	H	H
	chr01	23592455	G	A	1078.36	KS specific	A	B	A	A	AH	H	H	AH	H	AH	AH	H	H	H	AH	AH	AH	H	AH	H	AH	H
	chr01	23592487	G	A	1091.53	KS specific	A	B	A	AH	H	H	H	AH	H	AH	AH	H	H	H	AH	AH	AH	H	H	H	AH	H
	chr01	24258591	G	A	1294.91	KS specific	A	B	A	A	H	H	H	H	AH	H	H	H	H	H	H	H	H	H	AH	H	H	H
	chr01	24258608	A	G	1336.97	KS specific	A	B	A	A	H	H	H	H	AH	H	H	H	H	H	H	H	H	H	AH	H	H	H
	chr01	25121581	G	A	2098.61	KS specific	A	B	A	A	H	H	H	H	AH	H	H	H	H	H	H	H	H	H	H	H	H	H
	chr01	32765109	G	A	2437.27	KS specific	A	B	A	A	H	H	H	H	H	H	H	H	H	H	H	H	H	H	H	H	H	H
	chr01	33883203	A	T	1705.66	KS specific	A	B	A	A	H	H	H	H	H	H	H	H	H	H	H	H	H	H	H	H	H	H
	chr01	37398995	T	C	2094.91	KS specific	A	B	A	A	H	H	H	AH	H	H	H	H	H	H	H	H	H	H	H	H	H	H
	chr01	39380750	A	C	888.808	KS specific	A	B	AH	A	H	H	H	AH	H	H	H	AH	AH	H	AH	H	H	H	AH	H	H	H
	chr01	39380759	T	C	886.264	KS specific	A	B	AH	A	H	H	H	AH	H	H	H	AH	AH	H	AH	H	H	H	AH	H	H	H
	chr01	41212021	G	A	1811.19	KS specific	A	B	A	AH	H	H	H	H	AH	AH	AH	H	H	AH	AH	H	H	AH	H	H	AH	H
	chr02	1520181	T	C	3653.32	KS specific	A	B	A	A	H	H	H	H	H	H	H	H	H	H	H	H	H	H	H	H	H	H
	chr02	1727777	A	G	4411.42	KS specific	A	B	A	A	H	H	H	H	H	H	H	H	H	H	H	H	H	H	H	H	H	H
	chr02	1763339	A	C	3783.69	KS specific	A	B	A	A	H	H	H	H	H	H	H	H	H	H	H	H	H	H	H	H	H	H
	chr02	16776865	G	A	594.682	KS specific	A	B	A	A	H	H	H	H	H	H	H	H	H	H	H	H	H	AH	H	H	H	H
	chr02	16844275	T	G	755.178	KS specific	A	B	A	A	H	H	H	H	H	AH	AH	H	H	H	H	H	H	H	H	H	A	H
	chr02	17146121	G	A	1943.49	KS specific	A	B	A	A	H	H	H	H	H	AH	H	AH	AH	H	H	H	H	H	AH	H	H	H
	chr02	22937160	T	C	885.458	KS specific	A	B	A	A	H	H	H	H	H	H	H	AH	H	AH	H	H	H	H	H	H	AH	H
	chr02	22996561	G	A	3255.93	KS specific	A	B	A	A	H	H	H	H	H	H	H	H	H	H	H	H	H	H	H	H	H	H
	chr02	24132292	G	T	620.353	KS specific	A	B	A	A	H	H	H	AH	AH	AH	AH	AH	AH	AH	AH	AH	AH	AH	AH	AH	AH	H
	chr02	24818605	C	T	1212.27	KS specific	A	B	AH	A	H	H	H	H	H	H	H	H	H	H	AH	H	H	H	H	H	H	AH
	chr02	24818626	C	T	1249.42	KS specific	A	B	A	A	H	H	H	H	H	H	H	H	H	H	AH	H	H	H	H	H	H	AH
	chr02	24818977	G	A	1959	KS specific	A	B	A	A	H	H	H	H	H	H	H	H	H	H	AH	H	H	H	H	H	H	AH
	chr02	26111640	C	T	2546.48	KS specific	A	B	A	A	H	H	H	H	AH	AH	H	H	H	AH	H	H	AH	H	H	H	H	AH
	chr02	26374168	G	A	3435	KS specific	A	B	A	A	H	H	H	H	H	H	H	H	H	H	H	H	H	H	H	H	H	H
	chr02	31653507	G	T	1350.24	KS specific	A	B	A	A	H	H	H	AH	H	H	AH	H	H	H	H	H	H	H	H	H	AH	AH
	chr02	33244554	G	A	242.61	KS specific	A	B	A	A	H	H	H	AH	AH	AH	H	AH	AH	AH	H	AH	H	AH	AH	AH	AH	AH
	chr02	33926760	T	G	1725.46	KS specific	A	B	A	A	H	H	H	H	H	H	H	H	H	H	H	H	H	H	H	H	H	H
	chr02	34045899	G	T	432.001	KS specific	A	B	A	A	H	H	H	AH	H	H	H	H	H	AH	H	H	H	AH	AH	AH	AH	H
	chr02	34045900	A	G	358.983	KS specific	A	B	A	A	H	H	H	AH	H	H	H	H	H	AH	H	AH	H	AH	AH	AH	AH	H
	chr02	34045942	A	G	404.47	KS specific	A	B	A	A	H	H	H	AH	H	H	H	H	H	AH	H	H	H	AH	AH	AH	AH	H
	chr02	34045945	A	T	420.126	KS specific	A	B	A	A	H	H	H	AH	H	H	H	H	H	AH	H	H	H	AH	AH	AH	AH	H
	chr03	5432329	T	C	4496.59	KS specific	A	B	A	A	H	H	H	H	H	H	H	H	H	H	H	H	H	H	H	H	H	H
	chr03	8506984	G	A	2294.64	KS specific	A	B	A	A	H	H	H	H	H	H	H	H	H	H	H	H	H	H	H	H	H	H
	chr03	8507031	G	A	4572.87	KS specific	A	B	A	A	H	H	H	H	H	H	H	H	H	H	H	H	H	H	H	H	H	H
	chr03	9407704	A	T	2135.21	KS specific	A	B	A	A	H	H	H	H	H	H	H	H	H	H	H	H	H	H	H	H	H	H
	chr03	9578294	G	A	4713.95	KS specific	A	B	A	A	BH	BH	H	H	BH	H	H	H	H	H	H	H	H	H	H	H	H	BH
	chr03	9578352	C	A	4713.86	KS specific	A	B	A	A	BH	BH	H	H	BH	H	H	H	H	H	H	H	H	H	H	H	H	BH
	chr03	9925704	A	G	1290.15	KS specific	A	B	A	A	H	H	H	H	H	H	H	H	AH	H	H	H	H	H	H	H	H	H
	chr03	12324676	T	C	1967.58	KS specific	A	B	A	AH	H	H	H	H	H	H	H	H	H	H	H	H	H	H	H	H	H	H
	chr03	12435065	G	A	3424.28	KS specific	A	B	A	A	H	H	H	H	H	H	H	H	H	H	H	H	H	H	H	H	H	H
	chr03	13243027	T	A	4447.69	KS specific	A	B	A	A	H	H	H	H	H	H	H	H	H	H	H	H	H	H	H	H	H	H
	chr03	13279058	G	A	2828.7	KS specific	A	B	A	A	H	H	H	H	H	H	H	H	AH	H	H	H	H	H	H	H	H	H
	chr03	13279066	T	C	2804.36	KS specific	A	B	A	A	H	H	H	H	H	H	H	H	AH	H	H	H	H	H	H	H	H	H
	chr03	16760117	C	T	820.597	KS specific	A	B	A	A	A	H	H	AH	H	AH	AH	H	A	A	H	H	AH	AH	AH	AH	H	H
	chr03	18289963	G	A	874.988	KS specific	A	B	A	A	H	H	H	H	A	H	H	AH	H	H	H	H	A	H	H	A	H	H
	chr03	18289984	C	G	874.988	KS specific	A	B	A	A	H	H	H	H	A	H	H	AH	H	H	H	H	A	H	H	A	H	H
	chr03	21529865	A	T	228.769	KS specific	A	B	A	A	H	H	H	AH	AH	H	AH	AH	AH	AH	AH	AH	AH	H	AH	H	AH	AH
	chr03	22206099	A	T	1426.88	KS specific	A	B	A	A	H	H	H	H	H	H	AH	H	H	H	AH	AH	H	H	H	H	H	H
	chr03	22206132	G	A	1501.8	KS specific	A	B	A	A	H	H	H	H	H	H	AH	H	H	H	AH	AH	H	H	H	H	H	H
	chr03	22206189	G	A	2988.47	KS specific	A	B	A	A	H	H	H	H	H	H	AH	H	H	H	H	H	H	H	H	H	H	H
	chr03	23462019	G	A	2869.36	KS specific	A	B	A	A	H	H	H	AH	H	H	H	H	H	H	H	H	H	H	H	H	H	H
	chr03	23612975	G	A	1429.48	KS specific	A	B	A	A	H	B	H	H	A	H	H	H	H	H	H	H	H	H	H	H	H	H
	chr03	23613011	C	T	1421.21	KS specific	A	B	A	A	H	B	H	H	A	H	H	H	H	H	H	H	H	H	H	H	H	H
	chr03	23613024	T	G	1314.05	KS specific	A	B	A	A	H	B	H	H	A	H	H	H	H	H	H	H	H	H	H	H	H	H
	chr03	23613040	A	G	1487.34	KS specific	A	B	A	A	H	B	H	H	A	H	H	H	H	H	H	H	H	H	H	H	H	H
	chr03	23737977	C	T	1492.29	KS specific	A	B	A	A	H	H	H	H	H	H	H	H	H	H	H	H	H	H	H	H	H	H
	chr03	23737998	G	A	1481.2	KS specific	A	B	A	A	H	H	H	H	H	H	H	H	H	H	H	H	H	H	H	H	H	H
	chr03	23738025	G	A	1491.25	KS specific	A	B	A	A	H	H	H	H	H	H	H	H	H	H	H	H	H	H	H	H	H	H
	chr03	24312377	G	A	1013.03	KS specific	A	B	AH	A	H	H	H	AH	H	H	AH	AH	AH	H	AH	AH	H	H	AH	H	AH	AH
	chr03	28342653	C	T	1890.16	KS specific	A	B	A	A	H	H	H	H	H	H	H	H	H	H	H	H	H	H	H	H	H	H
	chr03	28619687	G	A	1136.78	KS specific	A	B	A	A	H	H	H	AH	H	AH	AH	AH	AH	H	H	H	AH	AH	AH	AH	H	AH
	chr03	28619714	G	A	1140.56	KS specific	A	B	A	A	H	H	H	AH	H	AH	AH	AH	AH	H	H	H	AH	AH	AH	AH	H	AH
	chr03	32363970	T	C	4428.36	KS specific	A	B	A	A	H	H	H	H	H	H	H	H	H	H	H	H	H	H	H	H	H	H
	chr03	33117843	A	G	3311.45	KS specific	A	B	A	A	H	H	H	H	H	H	H	H	H	H	H	H	H	H	H	H	H	H
	chr03	33249532	C	T	3506	KS specific	A	B	AH	A	BH	BH	BH	H	H	H	H	H	H	H	H	H	H	H	H	H	H	H
	chr03	35803409	T	C	1708.71	KS specific	A	B	A	A	H	H	H	H	H	H	H	H	AH	H	H	H	H	H	AH	H	H	H
	chr04	384130	G	A	790.896	KS specific	A	B	A	A	H	H	H	H	H	AH	H	H	H	H	AH	H	H	H	H	H	H	H
	chr04	384225	C	G	753.651	KS specific	A	B	A	A	H	H	H	H	H	AH	H	H	H	H	H	H	H	H	H	H	H	H
	chr04	1004575	G	A	229.471	KS specific	A	B	A	A	H	H	H	H	AH	AH	A	AH	AH	AH	H	H	AH	H	AH	AH	AH	H
	chr04	1004585	G	A	245.914	KS specific	A	B	A	A	H	H	H	H	AH	AH	A	AH	AH	AH	H	H	AH	H	AH	AH	AH	H
	chr04	1724930	G	C	2279.15	KS specific	A	B	A	A	H	H	H	AH	H	H	H	H	H	H	H	H	H	H	H	H	H	H
	chr04	3484206	C	T	239.945	KS specific	A	B	A	A	BH	BH	BH	BH	H	BH	H	BH	BH	H	BH	BH	BH	H	BH	H	BH	H
	chr04	4448720	A	C	3166.95	KS specific	A	B	A	A	H	H	H	H	H	H	H	H	H	H	H	H	H	H	H	H	H	H
	chr04	4448726	A	G	3201.23	KS specific	A	B	A	A	H	H	H	H	H	H	H	H	H	H	H	H	H	H	H	H	H	H
	chr04	4498110	T	C	496.57	KS specific	A	B	A	A	H	H	H	H	H	H	H	H	H	H	AH	H	H	A	H	H	H	H
	chr04	4498131	A	G	506.312	KS specific	A	B	A	A	H	H	H	H	H	H	H	H	H	H	AH	H	H	A	H	H	H	H
	chr04	4498186	A	G	741.184	KS specific	A	B	A	A	H	H	H	H	AH	H	H	H	H	H	AH	AH	H	A	H	AH	H	H
	chr04	4498228	C	T	519.154	KS specific	A	B	A	A	H	H	H	H	H	H	H	H	H	H	AH	H	H	A	H	H	H	H
	chr04	4498305	C	T	522.12	KS specific	A	B	A	A	H	H	H	H	H	H	H	H	H	H	AH	H	H	A	H	H	H	H
	chr04	4694978	T	G	1315.68	KS specific	A	B	A	A	H	H	H	H	AH	H	H	H	AH	H	H	AH	H	H	H	A	AH	H
	chr04	7474601	C	T	1709.36	KS specific	A	B	A	A	H	H	H	H	H	H	H	H	H	H	H	H	H	H	H	H	H	H
	chr04	8648908	C	G	235.42	KS specific	A	B	A	A	H	H	H	AH	AH	AH	AH	AH	AH	AH	AH	AH	AH	AH	AH	AH	AH	AH
	chr04	9275317	G	A	4742.87	KS specific	A	B	A	A	H	H	H	H	H	H	H	H	H	H	H	H	H	H	H	H	H	H
	chr04	10932329	G	A	2182.74	KS specific	A	B	A	A	H	H	H	H	H	H	H	H	H	H	H	H	H	H	H	H	H	H
	chr04	13569602	C	A	2463.7	KS specific	A	B	A	A	H	H	H	H	H	H	H	H	H	H	H	H	H	H	H	H	H	H
	chr04	13688931	C	T	323.154	KS specific	A	B	A	A	H	H	H	H	H	H	H	H	H	H	H	H	H	H	H	H	H	H
	chr04	15954527	A	G	4647.25	KS specific	A	B	A	A	H	H	H	H	H	H	H	H	H	H	H	H	H	H	H	H	H	BH
	chr04	15954532	C	T	4647.27	KS specific	A	B	A	A	H	H	H	H	H	H	H	H	H	H	H	H	H	H	H	H	H	BH
	chr04	15954533	G	A	4647.25	KS specific	A	B	A	A	H	H	H	H	H	H	H	H	H	H	H	H	H	H	H	H	H	BH
	chr04	16533981	A	G	1869.7	KS specific	A	B	A	A	H	H	H	H	H	H	H	H	H	H	H	H	H	H	H	H	H	H
	chr04	16534071	A	G	1823.02	KS specific	A	B	A	A	H	H	H	H	H	H	H	H	H	H	H	H	H	H	H	H	H	H
	chr04	16534107	T	C	4293.2	KS specific	A	B	A	A	H	H	H	H	H	H	H	H	H	H	H	H	H	H	H	H	H	H
	chr04	16534157	A	G	1905.66	KS specific	A	B	A	A	H	H	H	H	H	H	H	H	H	H	H	H	H	H	H	H	H	H
	chr04	20431070	C	T	1670.14	KS specific	A	BH	A	A	H	H	H	H	H	H	H	H	H	AH	H	H	H	H	H	H	H	H
	chr04	20431143	G	A	1639.68	KS specific	A	B	A	A	H	H	H	H	H	H	H	H	H	AH	H	H	H	H	H	H	H	H
	chr04	21979803	T	C	4454.19	KS specific	A	B	A	A	H	H	H	H	H	H	H	H	H	H	H	H	H	H	H	H	H	H
	chr04	22302939	G	A	3057.84	KS specific	A	B	A	A	H	H	H	H	H	H	H	H	H	H	H	H	AH	H	H	H	H	H
	chr04	22993274	C	A	1808.42	KS specific	A	B	A	A	H	H	H	H	H	H	H	H	H	H	H	H	H	H	H	H	A	H
	chr04	23279212	G	A	4648.69	KS specific	A	B	A	A	H	H	H	H	H	H	H	H	H	H	H	H	H	H	H	H	H	H
	chr04	24206537	G	T	1990.33	KS specific	A	B	A	A	H	H	H	H	H	H	H	H	H	AH	H	H	H	H	H	H	H	H
	chr04	24206582	G	A	1990.33	KS specific	A	B	A	A	H	H	H	H	H	H	H	H	H	AH	H	H	H	H	H	H	H	H
	chr04	24282021	T	C	1179.59	KS specific	A	B	A	A	H	H	H	AH	H	H	AH	H	H	H	AH	AH	AH	H	AH	H	H	H
	chr04	25424787	A	G	3360.56	KS specific	A	B	A	A	H	H	H	H	H	H	H	H	H	H	H	H	H	H	H	H	H	H
	chr04	28261193	C	T	419.926	KS specific	A	BH	A	A	H	H	H	AH	AH	H	AH	AH	AH	H	AH	H	AH	AH	AH	AH	AH	H
	chr04	29550543	C	T	1372.56	KS specific	A	B	A	A	H	H	H	H	H	H	H	H	H	H	H	H	H	H	H	H	H	H
	chr04	29550563	G	A	1359.23	KS specific	A	B	A	A	H	H	H	H	H	H	H	H	H	H	H	H	H	H	H	H	H	H
	chr04	29550598	C	G	2120.61	KS specific	A	B	A	A	H	H	H	H	H	H	H	H	H	H	H	H	H	H	H	H	H	H
	chr04	29550599	C	T	2122.41	KS specific	A	B	A	A	H	H	H	H	H	H	H	H	H	H	H	H	H	H	H	H	H	H
	chr04	29550617	C	A	1396.29	KS specific	A	B	A	A	H	H	H	H	H	H	H	H	H	H	H	H	H	H	H	H	H	H
	chr04	29550624	T	C	1341.86	KS specific	A	B	A	A	H	H	H	H	H	H	H	H	H	H	H	H	H	H	H	H	H	H
	chr04	31215113	A	C	3102.18	KS specific	A	B	A	A	H	H	H	H	H	H	H	H	H	H	H	H	H	H	H	H	H	H
	chr04	31370236	C	T	1739.17	KS specific	A	B	A	A	H	H	H	H	H	H	H	H	H	H	H	H	H	H	H	H	H	H
	chr04	31454271	A	T	2209.14	KS specific	A	B	A	A	H	H	H	H	H	H	H	H	H	H	H	H	H	H	H	H	H	H
	chr05	2094297	G	C	2370.93	KS specific	A	B	A	A	H	H	H	H	H	H	H	H	H	H	H	H	H	H	H	H	H	H
	chr05	3012624	A	G	1221.32	KS specific	A	B	A	A	H	H	H	H	AH	H	H	AH	H	H	AH	H	H	H	H	H	H	H
	chr05	3892608	C	T	1440.01	KS specific	A	B	A	A	H	H	H	H	H	H	H	H	H	H	H	H	H	A	H	H	H	AH
	chr05	3892743	C	T	1725.52	KS specific	A	B	A	A	H	H	H	H	H	H	H	H	H	H	H	H	H	H	H	H	H	AH
	chr05	3966111	A	G	3702.15	KS specific	A	B	A	A	H	H	H	H	H	H	H	H	H	H	H	H	H	H	H	H	H	H
	chr05	3966116	C	T	3702.18	KS specific	A	B	A	A	H	H	H	H	H	H	H	H	H	H	H	H	H	H	H	H	H	H
	chr05	5878439	A	C	200.897	KS specific	A	B	A	A	AH	H	H	AH	AH	AH	AH	AH	AH	AH	AH	AH	AH	AH	AH	AH	AH	AH
	chr05	6243829	A	G	2725.91	KS specific	A	B	AH	A	H	H	H	H	H	H	H	H	H	H	H	H	H	H	H	H	H	H
	chr05	6243863	A	G	2718.14	KS specific	A	B	AH	A	H	H	H	H	H	H	H	H	H	H	H	H	H	H	H	H	H	H
	chr05	6389029	A	G	2200.26	KS specific	A	B	A	A	H	H	H	H	H	H	H	H	H	H	H	AH	H	H	H	H	H	H
	chr05	6705318	A	C	4669.33	KS specific	A	BH	A	A	H	H	H	H	H	H	H	H	H	H	H	H	H	H	H	H	H	H
	chr05	8842334	G	A	1059.59	KS specific	A	B	A	A	H	H	H	H	H	H	H	H	H	AH	AH	H	H	H	AH	H	H	AH
	chr05	8842553	T	C	820.588	KS specific	A	B	A	A	H	H	H	AH	H	H	H	H	H	AH	AH	H	H	H	AH	H	H	AH
	chr05	9098384	C	T	2190.39	KS specific	A	B	A	A	H	H	H	H	H	H	H	H	H	H	H	H	H	H	H	H	H	H
	chr05	9098472	C	G	2185.21	KS specific	A	B	A	A	H	H	H	H	H	H	H	H	H	H	H	H	H	H	H	H	H	H
	chr05	9239958	C	G	4742.02	KS specific	A	B	A	A	H	H	H	H	H	H	H	H	H	H	H	H	H	H	H	H	H	H
	chr05	9239976	G	C	4742.1	KS specific	A	B	A	A	H	H	H	H	H	H	H	H	H	H	H	H	H	H	H	H	H	H
	chr05	12599707	G	A	338.478	KS specific	A	B	A	A	H	H	H	AH	AH	AH	AH	AH	AH	AH	AH	AH	AH	AH	AH	AH	AH	AH
	chr05	13290262	C	G	1737.63	KS specific	A	B	A	A	H	H	H	H	H	H	H	H	H	H	H	H	H	H	H	H	H	H
	chr05	13445320	A	G	2206.85	KS specific	A	B	A	A	H	H	H	H	H	H	H	H	H	H	H	H	H	H	H	H	H	H
	chr05	13529157	C	T	2497.13	KS specific	A	B	A	A	H	H	H	H	H	H	H	H	H	H	H	H	H	H	H	H	H	H
	chr05	13685626	C	T	3518.36	KS specific	A	B	A	A	H	H	H	H	H	H	H	H	H	H	H	H	H	H	H	H	H	H
	chr05	13685670	G	A	3518.31	KS specific	A	B	A	A	H	H	H	H	H	H	H	H	H	H	H	H	H	H	H	H	H	H
	chr05	14005619	A	G	1637.68	KS specific	A	B	A	A	H	H	H	H	H	H	H	H	H	H	H	H	H	A	H	AH	H	AH
	chr05	14005654	A	C	987.737	KS specific	A	B	A	A	H	H	H	AH	H	H	H	H	H	H	H	H	H	A	AH	AH	H	AH
	chr05	14159481	C	T	2810.63	KS specific	A	B	A	A	H	H	H	H	AH	AH	H	H	H	AH	H	H	H	AH	H	H	H	H
	chr05	14159514	G	A	3625.12	KS specific	A	B	A	A	H	H	H	H	H	H	H	H	H	H	H	H	H	H	H	H	H	H
	chr05	15062880	C	T	1955.44	KS specific	A	B	A	A	H	H	H	H	H	H	H	H	AH	H	H	H	H	H	H	H	H	H
	chr05	15495658	G	A	2254.59	KS specific	A	B	A	A	H	H	H	H	H	H	H	H	H	H	H	H	H	H	H	H	H	H
	chr05	15495703	T	C	2100.04	KS specific	A	B	A	A	H	H	H	H	H	H	H	H	H	H	H	H	H	H	H	H	H	H
	chr05	15495724	C	T	2244.45	KS specific	A	B	A	A	H	H	H	H	H	H	H	H	H	H	H	H	H	H	H	H	H	H
	chr05	15520128	G	A	606.74	KS specific	A	B	A	A	H	H	H	H	H	H	H	H	H	H	H	H	H	H	H	H	H	H
	chr05	16156845	G	A	3686.87	KS specific	A	B	A	A	H	BH	H	H	H	H	H	H	H	H	H	H	H	H	H	H	H	H
	chr05	16156884	C	T	3652.86	KS specific	A	B	A	A	H	BH	H	H	H	H	H	H	H	H	H	H	H	H	H	H	H	H
	chr05	16156940	G	A	3730.8	KS specific	A	B	A	A	H	BH	H	H	H	H	H	H	H	H	H	H	H	H	H	H	H	H
	chr05	17958494	C	T	2481.82	KS specific	A	B	A	A	H	H	H	H	H	H	H	H	H	H	H	H	H	H	H	H	H	H
	chr05	22573342	G	A	2987.86	KS specific	A	B	A	A	H	H	H	H	H	H	H	H	H	H	H	H	H	H	H	H	H	H
	chr05	22573380	G	A	3010.89	KS specific	A	B	A	A	H	H	H	H	H	H	H	H	H	H	H	H	H	H	H	H	H	H
	chr05	22573410	A	G	2962.73	KS specific	A	B	A	A	H	H	H	H	H	H	H	H	H	H	H	H	H	H	H	H	H	H
	chr05	24674123	G	A	4335.49	KS specific	A	B	A	A	H	H	H	H	H	H	H	H	H	H	H	H	H	H	H	H	H	H
	chr05	24772172	C	T	729.839	KS specific	A	B	A	A	H	H	H	H	H	H	H	AH	AH	H	H	AH	AH	AH	AH	AH	H	H
	chr05	24772207	T	C	683.231	KS specific	A	B	A	A	H	H	H	H	H	H	H	AH	AH	H	H	AH	AH	AH	AH	AH	H	H
	chr05	25086979	A	G	3391.36	KS specific	A	B	A	A	H	H	H	H	H	H	H	H	H	H	H	H	H	H	H	H	H	H
	chr05	25087016	T	C	4538.23	KS specific	A	B	A	A	H	H	H	H	H	H	H	H	H	H	H	H	H	H	H	H	H	H
	chr05	25087079	T	G	2727.2	KS specific	A	B	A	A	H	H	H	H	H	H	H	H	H	H	H	H	H	H	H	H	H	H
	chr05	25087102	G	A	2772.34	KS specific	A	B	A	A	H	H	H	H	H	H	H	H	H	H	H	H	H	H	H	H	H	H
	chr05	26269687	A	G	3974.85	KS specific	A	B	A	A	H	H	H	H	H	H	H	H	H	H	H	H	H	H	H	H	H	H
	chr05	26269707	G	A	3971.85	KS specific	A	B	A	A	H	H	H	H	H	H	H	H	H	H	H	H	H	H	H	H	H	H
	chr05	26948291	A	C	1631.45	KS specific	AH	B	A	A	H	H	H	AH	H	H	H	H	H	H	H	H	H	H	H	H	H	H
	chr05	26948377	T	C	1983.66	KS specific	A	B	AH	A	H	H	H	H	H	H	H	H	H	H	H	H	H	H	H	H	H	H
	chr05	26948539	G	A	1546.21	KS specific	A	B	A	AH	H	H	H	AH	H	H	H	AH	H	H	H	H	H	H	H	H	H	H
	chr05	26948562	C	T	1705.8	KS specific	A	B	AH	A	H	H	H	AH	H	H	H	H	H	H	H	H	H	H	H	H	H	H
	chr05	27083951	G	A	3531.87	KS specific	A	B	A	A	H	BH	BH	H	H	H	H	H	H	BH	H	H	H	H	H	H	H	H
	chr05	27084020	C	T	3536.25	KS specific	A	B	A	A	H	BH	BH	H	H	H	H	H	H	BH	H	H	H	H	H	H	H	H
	chr05	27414817	T	C	3046.16	KS specific	A	B	A	A	H	H	H	H	H	H	H	H	AH	H	H	H	H	H	H	H	H	H
	chr05	28596308	A	G	4602.23	KS specific	A	B	A	A	H	H	H	H	H	H	H	H	H	H	H	H	H	H	H	H	H	H
	chr05	28608384	T	C	1412.17	KS specific	A	B	A	A	H	H	H	H	H	H	H	H	H	H	H	H	H	H	H	H	H	H
	chr05	29439342	C	T	2101.43	KS specific	A	B	A	A	H	H	H	H	H	H	H	H	H	H	H	H	H	H	H	H	H	H
	chr06	1969384	T	C	1883.9	KS specific	A	B	A	A	H	H	H	H	H	H	H	H	H	AH	H	H	H	H	H	H	H	H
	chr06	2235304	G	A	1733.49	KS specific	A	B	A	A	H	H	H	H	H	H	H	H	H	H	H	H	A	H	H	H	H	H
	chr06	2887041	G	A	476.834	KS specific	A	B	A	A	AH	H	H	AH	H	AH	AH	AH	AH	AH	AH	AH	AH	H	H	H	AH	AH
	chr06	2887120	C	G	477.91	KS specific	A	B	A	A	AH	H	H	AH	H	AH	AH	AH	AH	AH	AH	AH	AH	H	H	H	AH	AH
	chr06	2887138	C	T	546.13	KS specific	A	B	A	A	AH	H	H	AH	H	H	AH	AH	H	AH	AH	AH	AH	H	H	H	AH	AH
	chr06	3324745	C	T	2183.78	KS specific	A	B	A	AH	H	H	H	H	H	H	H	H	H	H	H	H	H	H	H	H	H	H
	chr06	3954866	C	A	4071.1	KS specific	A	BH	A	A	H	H	H	H	H	H	H	H	H	H	H	H	H	H	H	H	H	H
	chr06	3954874	C	T	4073.91	KS specific	A	BH	A	A	H	H	H	H	H	H	H	H	H	H	H	H	H	H	H	H	H	H
	chr06	3954880	A	G	4069.04	KS specific	A	BH	A	A	H	H	H	H	H	H	H	H	H	H	H	H	H	H	H	H	H	H
	chr06	6767900	A	G	2967	KS specific	A	B	A	A	H	H	H	H	H	H	H	H	H	H	H	H	H	H	H	H	H	H
	chr06	6932381	C	G	759.304	KS specific	A	B	A	A	H	H	H	AH	AH	AH	AH	AH	AH	H	H	AH	AH	H	A	AH	H	AH
	chr06	6932397	G	T	758.867	KS specific	A	B	A	AH	H	H	H	AH	AH	AH	AH	AH	AH	H	H	AH	AH	H	A	AH	H	AH
	chr06	12942958	G	C	1845.08	KS specific	A	B	A	A	H	H	H	H	H	H	H	H	H	H	H	H	H	H	H	H	H	H
	chr06	12942987	A	T	1860.11	KS specific	A	B	A	A	H	H	H	H	H	H	H	H	H	H	H	H	H	H	H	H	H	H
	chr06	15531904	C	A	752.375	KS specific	A	B	A	A	H	H	H	AH	H	AH	H	AH	H	AH	AH	H	AH	AH	AH	H	H	AH
	chr06	15644461	G	A	1731.61	KS specific	A	B	A	A	H	H	H	H	AH	H	H	AH	H	H	H	H	H	H	AH	AH	H	AH
	chr06	16302328	C	T	2699.98	KS specific	A	B	A	A	H	H	H	H	H	H	H	H	H	H	H	H	H	H	H	H	H	H
	chr06	16302371	A	G	2754.22	KS specific	A	B	A	A	H	H	H	H	H	H	H	H	H	H	H	H	H	H	H	H	H	H
	chr06	16549644	G	A	654.878	KS specific	A	B	A	A	H	H	H	H	H	H	H	H	AH	A	H	H	H	H	H	H	H	AH
	chr06	16549816	G	T	1152.09	KS specific	A	B	A	A	H	H	H	H	H	H	H	H	H	AH	H	H	H	H	H	AH	H	AH
	chr06	16799465	A	T	1627.45	KS specific	A	B	A	A	H	H	H	AH	H	H	H	H	H	H	H	H	AH	H	H	H	H	H
	chr06	16799586	G	A	2861.02	KS specific	A	B	A	A	H	H	H	H	H	H	H	H	H	H	H	H	H	H	H	H	H	H
	chr06	17284337	G	C	2179.77	KS specific	A	B	A	A	H	H	H	H	H	H	H	H	H	H	H	H	H	H	H	H	H	H
	chr06	17676482	C	G	723.807	KS specific	AH	B	A	A	H	H	H	AH	H	AH	AH	AH	AH	H	AH	AH	AH	AH	AH	AH	AH	AH
	chr06	20548072	C	T	1811.23	KS specific	A	B	AH	A	H	H	H	H	H	H	H	H	H	H	H	H	H	H	H	H	H	H
	chr06	23495605	G	A	2175.23	KS specific	A	B	A	A	H	H	H	H	H	H	H	H	H	AH	H	H	AH	H	H	H	H	AH
	chr06	24275039	C	T	3263.32	KS specific	A	B	A	A	H	H	H	H	H	H	H	H	H	H	H	H	H	H	H	H	H	H
	chr06	24275048	T	C	3261.27	KS specific	A	B	A	A	H	H	H	H	H	H	H	H	H	H	H	H	H	H	H	H	H	H
	chr06	24275063	C	T	3264.3	KS specific	A	B	A	A	H	H	H	H	H	H	H	H	H	H	H	H	H	H	H	H	H	H
	chr06	24275094	G	A	3263.27	KS specific	A	B	A	A	H	H	H	H	H	H	H	H	H	H	H	H	H	H	H	H	H	H
	chr06	25111636	G	A	1924.02	KS specific	A	B	A	A	H	H	H	H	H	H	H	H	H	H	H	H	H	H	H	H	H	H
	chr06	26847268	G	A	4278.11	KS specific	A	B	A	A	H	H	H	H	H	H	H	H	H	H	H	H	H	H	H	H	H	H
	chr06	27447813	G	A	537.007	KS specific	A	B	A	A	H	H	H	H	AH	AH	AH	H	AH	AH	H	H	H	AH	AH	H	AH	H
	chr06	27447885	C	T	554.892	KS specific	A	B	A	A	H	H	H	H	AH	AH	AH	H	AH	AH	H	H	H	AH	AH	H	AH	H
	chr06	27563147	A	G	1483.4	KS specific	A	B	A	A	H	H	H	H	H	H	H	H	H	H	H	H	H	H	H	AH	H	H
	chr06	28033494	C	A	4340.81	KS specific	A	B	A	A	H	H	H	H	H	H	H	H	H	H	H	H	H	H	H	H	H	H
	chr07	746897	T	C	1657.08	KS specific	A	B	A	A	H	H	H	H	H	H	H	H	H	H	H	H	AH	H	H	AH	H	H
	chr07	772793	G	T	3885.9	KS specific	A	B	A	A	H	H	H	H	H	H	H	H	H	H	H	H	H	H	H	H	H	H
	chr07	772837	G	A	3897.91	KS specific	A	B	A	A	H	H	H	H	H	H	H	H	H	H	H	H	H	H	H	H	H	H
	chr07	1070592	A	C	2156.63	KS specific	A	B	A	A	H	H	H	H	H	H	H	H	AH	AH	H	H	H	AH	H	H	H	H
	chr07	1070613	C	T	2155.63	KS specific	A	B	A	A	H	H	H	H	H	H	H	H	AH	AH	H	H	H	AH	H	H	H	H
	chr07	1545535	G	T	4212.04	KS specific	A	B	A	A	H	H	H	H	H	H	H	H	H	H	H	H	H	H	H	H	H	H
	chr07	2342920	C	A	2486	KS specific	A	B	A	A	H	H	H	H	H	H	H	H	H	H	H	H	H	H	H	H	H	H
	chr07	2342948	A	G	2483.9	KS specific	A	B	A	A	H	H	H	H	H	H	H	H	H	H	H	H	H	H	H	H	H	H
	chr07	2342978	A	G	2483.93	KS specific	A	B	A	A	H	H	H	H	H	H	H	H	H	H	H	H	H	H	H	H	H	H
	chr07	2342983	G	A	2485.94	KS specific	A	B	A	A	H	H	H	H	H	H	H	H	H	H	H	H	H	H	H	H	H	H
	chr07	2342999	A	G	2485.93	KS specific	A	B	A	A	H	H	H	H	H	H	H	H	H	H	H	H	H	H	H	H	H	H
	chr07	3732663	G	A	2724.9	KS specific	A	B	A	A	H	H	H	H	H	H	H	H	H	H	H	H	H	H	H	H	H	H
	chr07	3732724	A	G	2314.74	KS specific	A	B	A	A	H	H	H	AH	H	H	H	H	H	H	H	H	H	H	H	H	H	H
	chr07	3732731	A	G	2337.59	KS specific	A	B	A	A	H	H	H	AH	H	H	H	H	H	H	H	H	H	H	H	H	H	H
	chr07	3732760	G	A	1260.02	KS specific	A	B	A	A	H	H	BH	BH	H	H	H	H	H	H	H	BH	H	H	H	H	H	H
	chr07	3781078	A	G	2419.18	KS specific	A	B	A	A	H	H	H	H	H	H	H	AH	H	H	H	H	H	H	H	H	AH	H
	chr07	3784783	C	A	2605.11	KS specific	A	B	A	A	H	H	H	H	H	H	H	H	H	H	H	AH	H	H	H	H	H	H
	chr07	4757181	C	T	1113.08	KS specific	A	B	A	A	H	H	H	AH	H	H	H	H	A	H	H	H	H	H	A	H	H	AH
	chr07	5033647	A	G	3765.7	KS specific	A	B	A	A	H	H	H	H	H	H	H	H	H	H	H	H	H	H	H	H	H	H
	chr07	5261415	C	T	4459.55	KS specific	A	B	A	A	H	H	H	H	H	H	H	H	H	H	H	H	H	H	H	H	H	H
	chr07	6176905	C	T	792.259	KS specific	A	B	A	A	H	H	H	H	H	H	AH	H	H	H	H	AH	H	H	H	H	H	H
	chr07	6176919	T	A	806.576	KS specific	A	B	A	A	H	H	H	H	H	H	AH	H	H	H	H	AH	H	H	H	H	H	H
	chr07	6176970	A	T	792.21	KS specific	A	B	A	A	H	H	H	H	H	H	AH	H	H	H	H	AH	H	H	H	H	H	H
	chr07	6177022	A	G	582.211	KS specific	A	B	A	A	H	H	H	H	H	H	AH	H	H	H	H	AH	H	H	H	H	H	H
	chr07	8440258	G	A	617.634	KS specific	A	B	AH	A	H	H	H	H	AH	H	H	H	H	H	AH	AH	H	H	H	H	H	AH
	chr07	8440261	G	A	617.631	KS specific	A	B	AH	A	H	H	H	H	AH	H	H	H	H	H	AH	AH	H	H	H	H	H	AH
	chr07	8447769	G	A	796.707	KS specific	A	B	A	A	H	H	H	H	H	H	H	H	H	H	H	H	H	H	H	H	H	H
	chr07	8447879	G	A	1958.47	KS specific	A	B	A	A	H	H	H	H	H	H	H	H	H	H	H	H	H	H	H	H	H	H
	chr07	16160672	C	T	964.285	KS specific	A	B	A	A	H	H	H	H	H	AH	H	H	H	H	H	AH	H	H	H	H	H	H
	chr07	18586536	C	T	2532.96	KS specific	A	B	A	A	H	H	H	H	H	H	H	H	H	H	H	H	H	H	H	H	H	H
	chr07	22349424	C	T	2658.89	KS specific	A	B	A	A	H	H	H	H	H	H	H	H	H	AH	H	AH	H	H	H	H	H	H
	chr07	22721595	T	C	3319.1	KS specific	A	BH	A	A	H	H	H	H	AH	H	H	H	H	AH	H	H	H	H	H	H	H	H
	chr07	25831283	C	T	227.354	KS specific	A	BH	A	A	H	H	H	AH	H	AH	H	AH	H	AH	AH	AH	H	AH	H	H	AH	H
	chr07	26368317	C	T	3834.77	KS specific	AH	B	AH	A	B	BH	BH	H	H	H	H	H	H	H	H	H	H	H	H	H	H	H
	chr08	3371826	C	T	4157.89	KS specific	A	BH	A	A	H	H	H	H	H	H	H	H	H	H	H	H	H	H	H	H	H	H
	chr08	3695747	C	T	1206.06	KS specific	A	B	A	A	H	H	H	H	H	H	H	H	H	H	H	H	H	H	H	H	AH	H
	chr08	3793976	T	A	4734.54	KS specific	A	B	A	A	H	H	H	H	H	H	H	H	H	H	H	H	H	H	H	H	H	H
	chr08	5247034	C	T	1255.66	KS specific	A	B	AH	A	H	H	H	H	H	H	H	AH	AH	H	H	AH	AH	H	AH	H	AH	H
	chr08	5247076	G	A	1223	KS specific	A	B	A	A	H	H	H	H	H	H	H	AH	AH	H	H	AH	AH	H	AH	H	AH	H
	chr08	5247093	G	A	1100.89	KS specific	A	BH	AH	A	H	H	H	H	H	H	H	AH	AH	AH	H	AH	AH	H	AH	H	AH	H
	chr08	7440887	G	A	398.974	KS specific	A	BH	A	AH	H	H	H	AH	AH	AH	AH	H	AH	AH	AH	H	AH	AH	AH	AH	AH	AH
	chr08	7440922	C	T	411.158	KS specific	A	BH	A	AH	H	H	H	AH	AH	AH	AH	H	AH	AH	AH	H	AH	AH	AH	AH	AH	AH
	chr08	7440960	G	C	392.556	KS specific	A	B	A	A	H	H	H	AH	AH	AH	AH	AH	AH	AH	AH	H	AH	AH	AH	AH	AH	AH
	chr08	8984034	C	T	2441.95	KS specific	A	B	A	A	H	H	H	H	H	H	H	H	H	H	H	H	H	H	H	H	H	H
	chr08	9306433	G	A	1278.94	KS specific	A	B	A	A	H	H	H	H	H	H	H	H	H	H	AH	H	H	H	H	H	H	H
	chr08	9306452	G	A	1557.37	KS specific	A	B	A	A	H	H	H	H	H	H	H	H	H	H	AH	H	H	H	H	H	H	H
	chr08	9306541	C	T	1465.85	KS specific	A	B	A	A	H	H	H	H	H	H	H	H	H	H	AH	H	H	H	H	H	H	H
	chr08	9306557	G	C	1328.66	KS specific	A	B	AH	A	H	H	H	H	H	H	H	H	H	H	AH	H	H	H	H	H	H	H
	chr08	9306649	G	A	1416.55	KS specific	A	B	A	A	H	H	H	H	H	H	H	H	H	H	AH	H	H	H	H	H	H	H
	chr08	9306683	C	T	1418.35	KS specific	A	B	A	A	H	H	H	H	H	H	H	H	H	H	AH	H	H	H	H	H	H	H
	chr08	10502585	C	T	706.375	KS specific	A	BH	A	A	H	H	H	H	H	AH	AH	H	H	H	H	H	H	H	H	H	AH	H
	chr08	11375767	T	C	495.588	KS specific	A	B	A	A	AH	H	H	H	AH	AH	H	AH	AH	H	AH	AH	H	H	H	AH	H	H
	chr08	11783626	A	G	1648.39	KS specific	A	B	A	A	H	H	H	H	H	H	H	H	AH	H	H	H	H	H	H	H	H	H
	chr08	11855394	C	T	534.55	KS specific	A	B	A	A	H	H	H	AH	AH	AH	AH	AH	AH	A	AH	AH	AH	H	AH	AH	H	AH
	chr08	12149899	G	A	655.126	KS specific	A	B	A	A	H	H	H	AH	AH	H	AH	AH	H	H	H	H	H	AH	H	AH	AH	AH
	chr08	12149913	G	A	397.041	KS specific	A	B	A	A	H	H	H	AH	AH	H	AH	AH	H	H	H	H	H	AH	H	AH	AH	AH
	chr08	13779570	G	A	1093.68	KS specific	A	B	A	A	H	H	H	H	H	AH	AH	AH	AH	H	AH	H	H	H	AH	AH	AH	H
	chr08	14083436	G	A	1315.24	KS specific	A	B	A	A	H	H	H	H	H	H	H	H	H	H	H	H	H	H	AH	H	H	H
	chr08	17537966	C	T	4095.25	KS specific	A	B	A	A	H	H	H	H	H	H	H	H	H	H	H	H	H	H	H	H	H	H
	chr08	17537978	C	T	4105.63	KS specific	AH	BH	A	A	H	H	H	H	H	H	H	H	H	H	H	H	H	H	H	H	H	H
	chr08	17659114	C	T	1232.99	KS specific	A	B	A	A	H	H	H	H	H	H	H	H	H	H	H	H	H	H	H	H	H	AH
	chr08	17659136	T	C	1232.99	KS specific	A	B	A	A	H	H	H	H	H	H	H	H	H	H	H	H	H	H	H	H	H	AH
	chr08	17711961	A	G	3976.86	KS specific	A	B	A	A	H	H	H	H	H	H	H	H	H	H	H	H	H	H	H	H	H	H
	chr08	17711968	G	C	3978.16	KS specific	A	B	A	A	H	H	H	H	H	H	H	H	H	H	H	H	H	H	H	H	H	H
	chr08	17711969	C	A	3979.17	KS specific	A	B	A	A	H	H	H	H	H	H	H	H	H	H	H	H	H	H	H	H	H	H
	chr08	18173230	T	C	2807.08	KS specific	A	B	A	A	H	H	H	H	H	H	H	H	H	H	H	H	H	H	H	H	H	H
	chr08	19150817	C	T	4547.86	KS specific	A	B	A	A	H	H	H	H	H	H	H	H	H	H	H	H	H	H	H	H	H	H
	chr08	19214253	C	T	2186.03	KS specific	AH	B	A	A	H	H	H	H	H	H	H	H	H	H	H	H	H	H	H	H	H	AH
	chr08	19692928	T	A	2971.81	KS specific	A	B	A	A	H	H	H	H	H	H	H	H	H	H	H	A	H	H	H	H	H	H
	chr08	20984893	C	T	4284.64	KS specific	A	B	A	A	H	H	H	H	H	H	H	H	H	H	H	H	H	H	H	H	H	H
	chr08	20984953	G	A	4281.79	KS specific	A	B	A	A	H	H	H	H	H	H	H	H	H	H	H	H	H	H	H	H	H	H
	chr08	21523495	T	G	1440.63	KS specific	A	B	A	A	H	H	H	AH	H	H	H	H	H	H	AH	H	H	H	H	H	H	H
	chr08	24290304	G	T	2671.25	KS specific	AH	B	A	A	H	H	H	H	H	H	H	H	H	H	H	H	H	H	H	H	H	H
	chr08	24290307	G	A	2722.87	KS specific	A	B	A	A	H	H	H	H	H	H	H	H	H	H	H	H	H	H	H	H	H	H
	chr08	24290308	C	T	2658.78	KS specific	A	B	A	A	H	H	H	H	H	H	H	H	H	H	H	H	H	H	H	H	H	H
	chr08	25210396	A	G	1319.16	KS specific	A	B	A	A	H	H	H	H	H	H	H	H	H	H	H	H	H	H	H	AH	H	AH
	chr08	25210488	C	T	1479.75	KS specific	A	B	A	A	H	H	H	H	H	H	H	H	H	H	H	H	H	H	H	H	H	H
	chr08	25210519	C	T	1540.73	KS specific	A	B	A	A	H	H	H	H	H	H	H	H	H	H	H	H	H	H	H	H	H	H
	chr09	294238	A	C	2161.56	KS specific	A	B	A	A	H	H	H	H	H	H	H	H	H	H	H	H	H	H	H	H	H	H
	chr09	453168	C	T	1938.04	KS specific	A	B	A	A	H	H	H	AH	H	H	H	H	H	H	H	H	H	H	H	H	H	H
	chr09	759159	C	T	3660.62	KS specific	A	B	A	A	B	BH	BH	H	H	H	H	H	H	H	H	H	H	H	H	H	H	H
	chr09	892459	G	A	2163.08	KS specific	A	B	A	A	H	H	H	H	H	H	H	H	H	H	H	H	H	H	H	H	AH	H
	chr09	6398876	G	T	2670.83	KS specific	A	B	A	A	H	H	H	H	H	H	H	H	H	H	H	H	H	H	H	H	H	H
	chr09	6826323	T	C	1323.91	KS specific	A	BH	A	A	H	H	H	H	H	H	H	H	H	H	H	H	H	H	AH	H	H	H
	chr09	8101224	A	T	423.278	KS specific	A	B	A	A	AH	H	H	H	H	AH	AH	H	AH	AH	AH	AH	AH	AH	AH	H	H	AH
	chr09	8101352	A	T	490.929	KS specific	A	B	A	A	AH	H	H	H	H	H	AH	H	AH	AH	AH	AH	AH	AH	AH	H	H	AH
	chr09	8101497	T	C	435.176	KS specific	A	B	A	A	AH	H	H	H	H	AH	AH	H	AH	AH	AH	AH	AH	AH	AH	H	H	AH
	chr09	8101580	A	G	390.282	KS specific	A	B	A	A	AH	H	H	H	H	AH	AH	H	AH	AH	AH	AH	AH	AH	AH	AH	H	AH
	chr09	10236776	T	C	474.977	KS specific	A	B	A	A	H	H	H	AH	H	H	AH	H	AH	H	AH	H	A	AH	H	AH	H	H
	chr09	11036143	C	T	2752.46	KS specific	A	B	A	A	H	H	H	H	H	H	H	H	H	H	H	A	H	H	H	H	H	H
	chr09	12408911	T	C	1728.69	KS specific	A	B	A	A	H	H	H	H	H	H	H	H	H	H	H	H	H	H	H	H	H	H
	chr09	13228363	C	T	2201.22	KS specific	A	B	A	A	H	H	H	H	H	H	H	H	H	H	H	H	H	H	H	H	H	H
	chr09	13228436	C	T	2202.31	KS specific	A	B	A	A	H	H	H	H	H	H	H	H	H	H	H	H	H	H	H	H	H	H
	chr09	13228644	C	T	659.365	KS specific	A	B	A	A	H	B	H	H	H	H	H	A	H	AH	H	H	H	H	H	H	H	H
	chr09	13329629	A	C	4710.71	KS specific	A	B	A	A	H	H	BH	H	H	H	H	H	H	H	H	H	H	H	H	H	H	H
	chr09	14921128	C	A	318.797	KS specific	A	B	A	A	H	H	H	AH	AH	AH	AH	AH	AH	AH	AH	AH	AH	AH	AH	AH	AH	AH
	chr09	14921153	C	T	319.842	KS specific	A	B	A	A	H	H	H	AH	AH	AH	AH	AH	AH	AH	AH	AH	AH	AH	AH	AH	AH	AH
	chr09	17678456	G	C	4335.71	KS specific	A	B	A	A	H	H	H	H	H	H	H	H	H	H	H	H	H	H	H	H	H	H
	chr09	18000215	G	A	1326.68	KS specific	A	B	A	A	H	H	H	H	AH	AH	AH	H	H	H	H	H	H	AH	AH	H	H	H
	chr09	18000220	C	T	1587.65	KS specific	A	B	AH	A	H	H	H	H	H	AH	AH	H	H	H	H	H	H	AH	AH	H	H	H
	chr09	19992480	A	G	1901.22	KS specific	A	B	A	A	H	H	H	H	H	H	H	H	H	H	H	H	H	H	H	H	H	H
	chr10	2020082	C	T	4037.59	KS specific	A	B	A	A	H	H	H	H	H	H	H	H	H	H	H	H	H	H	H	H	H	H
	chr10	3553487	G	A	2435.6	KS specific	A	B	A	A	H	H	H	H	H	H	H	H	H	H	H	H	H	H	H	H	H	H
	chr10	3553515	G	A	2397.31	KS specific	A	B	A	A	H	H	H	H	H	H	H	H	H	H	H	H	H	H	H	H	H	H
	chr10	3732945	G	A	371.267	KS specific	A	B	A	A	H	H	H	AH	H	AH	H	H	AH	H	AH	AH	AH	AH	AH	H	AH	H
	chr10	5302036	C	T	627.548	KS specific	A	B	A	A	H	H	H	H	H	AH	H	AH	H	H	H	AH	H	AH	H	AH	H	A
	chr10	5302049	G	A	631.548	KS specific	A	B	A	A	H	H	H	H	H	AH	H	AH	H	H	H	AH	H	AH	H	AH	H	A
	chr10	5302091	A	G	636.996	KS specific	A	B	A	A	H	H	H	H	H	AH	H	AH	H	H	H	AH	H	AH	H	AH	H	A
	chr10	5302130	G	A	391.649	KS specific	A	B	A	A	H	H	H	H	H	AH	H	AH	H	H	H	AH	H	AH	H	AH	H	A
	chr10	6246930	G	A	2860.81	KS specific	A	B	A	A	H	H	H	H	H	H	H	H	H	H	AH	H	H	H	H	H	H	H
	chr10	6388401	G	A	1453.36	KS specific	A	B	A	A	H	H	H	H	H	H	H	H	H	H	H	H	H	H	H	H	H	H
	chr10	6450509	G	C	1152.12	KS specific	A	B	A	A	H	H	H	H	H	H	H	H	H	H	H	H	H	H	H	H	H	H
	chr10	6450522	C	T	1165.09	KS specific	A	B	A	A	H	H	H	H	H	H	H	H	H	H	H	H	H	H	H	H	H	H
	chr10	6956978	C	T	907.549	KS specific	A	B	A	A	H	H	H	AH	AH	H	H	A	H	A	H	H	H	H	H	H	H	H
	chr10	6957003	C	T	878.361	KS specific	A	B	A	A	H	H	H	AH	AH	H	H	A	H	A	H	H	H	H	H	H	H	H
	chr10	8321879	C	T	1786.85	KS specific	A	B	A	A	H	H	H	H	H	H	AH	AH	H	H	H	H	H	H	H	H	H	H
	chr10	8379465	T	A	1350.34	KS specific	A	B	A	A	H	H	H	H	H	H	H	H	H	H	H	H	H	H	H	H	H	H
	chr10	9162810	C	T	2207.24	KS specific	A	B	A	A	H	H	H	H	H	AH	H	H	H	H	H	H	H	H	H	H	H	H
	chr10	9162955	G	A	2022.35	KS specific	AH	B	A	A	H	H	H	H	H	AH	H	H	H	H	H	H	H	H	H	H	H	H
	chr10	9492275	T	C	3751.33	KS specific	A	B	A	A	H	H	H	H	H	H	H	H	H	H	H	H	H	H	H	H	H	H
	chr10	9869693	G	A	932.812	KS specific	A	B	A	A	H	H	H	H	AH	H	H	H	H	H	H	H	H	H	AH	H	H	AH
	chr10	10087942	G	T	4737.82	KS specific	A	B	A	A	BH	BH	BH	BH	BH	BH	BH	H	BH	BH	H	BH	H	BH	BH	BH	BH	BH
	chr10	11869843	T	A	1888.24	KS specific	A	B	A	A	H	H	H	H	H	H	AH	H	H	H	H	H	H	H	H	H	H	H
	chr10	13304520	C	T	3433.52	KS specific	A	B	A	A	H	H	H	H	H	H	H	H	H	H	H	H	H	H	H	H	H	H
	chr10	13783528	G	A	2790.49	KS specific	A	B	A	A	H	H	H	H	H	H	H	H	H	H	H	H	H	H	H	H	H	AH
	chr10	17913592	T	C	4322.75	KS specific	A	B	A	A	H	H	H	H	H	H	H	H	H	H	H	H	H	H	H	H	H	H
	chr10	21159127	C	T	2468.68	KS specific	A	B	A	A	H	H	H	H	H	H	H	H	H	H	H	H	H	H	H	H	H	H
	chr11	3689533	G	A	396.459	KS specific	A	B	A	A	AH	H	H	AH	H	AH	AH	AH	AH	AH	AH	AH	AH	AH	AH	H	H	AH
	chr11	6534224	C	T	1861.42	KS specific	A	B	A	A	H	H	H	H	H	H	H	H	H	H	H	H	H	H	H	H	H	H
	chr11	11557245	G	A	3741.07	KS specific	A	B	A	A	H	H	H	H	H	H	H	H	H	H	H	H	H	H	H	H	H	H
	chr11	11922238	A	G	2760.16	KS specific	A	B	A	A	H	H	H	AH	H	H	H	H	H	H	H	H	H	H	H	H	H	H
	chr11	13319517	G	C	731.224	KS specific	A	B	A	A	H	H	H	AH	H	H	AH	AH	H	AH	H	H	AH	H	H	H	H	A
	chr11	13319577	G	A	361.55	KS specific	A	B	A	A	H	H	H	AH	H	AH	AH	AH	H	AH	H	H	AH	H	H	H	AH	A
	chr11	13343460	C	T	2198.27	KS specific	A	B	A	A	H	H	H	H	H	H	H	H	H	H	H	H	H	H	H	H	H	H
	chr11	13776968	G	A	2048.23	KS specific	A	B	A	A	H	H	H	A	H	H	H	H	H	H	H	H	H	H	H	H	H	A
	chr11	13776986	T	C	2048.25	KS specific	A	B	A	A	H	H	H	A	H	H	H	H	H	H	H	H	H	H	H	H	H	A
	chr11	14340935	G	A	1147.7	KS specific	A	B	A	A	H	H	H	AH	H	H	H	AH	AH	H	AH	AH	H	H	H	AH	H	H
	chr11	15441681	G	A	1270.19	KS specific	A	B	A	A	H	H	H	H	H	H	H	AH	H	H	H	H	H	H	H	H	H	H
	chr11	15557698	G	A	3728.15	KS specific	A	B	A	A	H	H	H	H	H	H	H	H	H	H	H	H	H	H	H	H	H	H
	chr11	15557715	C	T	3711.08	KS specific	A	B	A	A	H	H	H	H	H	H	H	H	H	H	H	H	H	H	H	H	H	H
	chr11	16330980	T	A	1499.39	KS specific	A	B	A	A	H	H	H	H	H	H	H	H	H	H	H	H	H	H	H	H	H	AH
	chr11	19104594	G	A	1465.42	KS specific	A	B	A	A	H	H	H	AH	H	H	H	H	AH	H	AH	H	H	AH	AH	H	H	H
	chr11	19538711	C	A	3813.88	KS specific	A	B	A	A	H	H	H	H	H	H	H	H	H	H	H	H	H	H	H	H	H	H
	chr11	21798111	T	C	1912.06	KS specific	A	B	A	A	H	H	H	H	H	H	H	H	H	H	H	H	H	H	H	H	H	H
	chr11	21798117	G	C	1900.11	KS specific	A	B	A	A	H	H	H	H	H	H	H	H	H	H	H	H	H	H	H	H	H	H
	chr11	21798120	C	T	1904	KS specific	A	B	A	A	H	H	H	H	H	H	H	H	H	H	H	H	H	H	H	H	H	H
	chr11	21798126	G	A	1902.15	KS specific	A	B	A	A	H	H	H	H	H	H	H	H	H	H	H	H	H	H	H	H	H	H
	chr11	24739140	C	T	395.438	KS specific	A	B	A	A	H	H	H	AH	H	H	H	AH	H	AH	AH	AH	AH	H	H	AH	AH	AH
	chr11	24739161	T	C	395.436	KS specific	A	B	A	A	H	H	H	AH	H	H	H	AH	H	AH	AH	AH	AH	H	H	AH	AH	AH
	chr11	24739196	C	T	395.436	KS specific	A	B	A	A	H	H	H	AH	H	H	H	AH	H	AH	AH	AH	AH	H	H	AH	AH	AH
	chr12	338431	G	A	205.874	KS specific	A	B	A	A	H	H	H	AH	H	H	AH	AH	H	AH	AH	AH	AH	H	H	H	AH	AH
	chr12	379942	G	A	2316.28	KS specific	A	B	A	A	H	H	H	H	H	H	H	H	H	H	H	H	H	H	H	H	H	H
	chr12	2083105	C	T	1311.14	KS specific	A	B	A	A	H	H	H	AH	H	H	AH	H	H	H	H	AH	H	AH	H	H	H	H
	chr12	2158038	C	A	1882.52	KS specific	A	B	A	A	H	H	H	H	H	H	H	H	H	H	H	H	H	H	H	H	H	H
	chr12	2308665	A	T	3206.28	KS specific	A	B	A	A	H	H	H	H	H	H	H	H	H	H	H	H	H	H	H	H	H	H
	chr12	7051220	G	A	376.355	KS specific	A	B	A	A	H	H	H	AH	AH	AH	AH	AH	AH	AH	AH	AH	AH	AH	AH	AH	AH	AH
	chr12	7051232	G	A	375.369	KS specific	A	B	A	AH	H	H	H	AH	AH	AH	AH	AH	AH	AH	AH	AH	AH	AH	AH	AH	AH	AH
	chr12	10321499	A	G	1646.98	KS specific	A	B	A	A	H	H	H	H	H	H	H	H	H	H	H	H	A	H	H	H	H	H
	chr12	10321548	T	G	2291.81	KS specific	A	B	A	A	H	H	H	H	H	H	H	H	H	H	H	H	H	H	H	H	H	H
	chr12	10321587	C	T	2286.79	KS specific	A	B	A	A	H	H	H	H	H	H	H	H	H	H	H	H	H	H	H	H	H	H
	chr12	11560635	C	T	771.516	KS specific	A	BH	A	A	H	H	H	H	H	H	H	H	H	H	H	H	H	H	H	AH	H	H
	chr12	13547068	A	G	3158.47	KS specific	A	B	A	A	H	H	H	H	H	H	H	H	H	H	H	H	H	H	H	H	H	H
	chr12	13547092	T	A	3158.49	KS specific	A	B	A	A	H	H	H	H	H	H	H	H	H	H	H	H	H	H	H	H	H	H
	chr12	13547107	A	T	3158.5	KS specific	A	B	A	A	H	H	H	H	H	H	H	H	H	H	H	H	H	H	H	H	H	H
	chr12	16556380	C	T	1574.82	KS specific	A	B	AH	A	H	H	H	H	H	H	H	H	H	H	H	H	H	H	H	H	H	AH
	chr12	16556459	C	T	3405.74	KS specific	A	B	A	A	H	H	H	H	H	H	H	H	H	H	H	H	H	H	H	H	H	AH
	chr12	16556504	C	T	3010.55	KS specific	AH	B	A	A	H	H	H	H	H	H	H	H	H	AH	H	H	H	H	H	H	H	AH
	chr12	17566505	G	A	1644.29	KS specific	A	B	A	A	H	H	H	H	H	H	H	H	H	H	H	H	H	AH	H	H	H	H
	chr12	17566534	C	A	1756.56	KS specific	A	B	A	A	H	H	H	H	H	H	H	H	H	H	H	H	H	A	H	H	H	H
	chr12	17566544	C	T	1645.65	KS specific	A	BH	A	A	H	H	H	H	H	H	H	H	H	H	H	H	H	A	H	H	H	H
	chr12	17963911	C	T	1468.31	KS specific	A	B	A	A	H	H	H	A	A	H	H	H	H	H	H	H	H	H	H	H	H	H
	chr12	19942623	C	T	230.008	KS specific	A	BH	A	A	A	H	H	AH	AH	AH	H	AH	H	AH	AH	H	AH	AH	H	AH	AH	H
	chr12	19942653	C	T	230.002	KS specific	A	BH	A	A	A	H	H	AH	AH	AH	H	AH	H	AH	AH	H	AH	AH	H	AH	AH	H
	chr12	19942684	G	A	234.271	KS specific	A	BH	A	A	A	H	H	AH	AH	AH	H	AH	H	AH	AH	H	AH	AH	H	AH	AH	H
	chr12	20919637	G	A	4543.81	KS specific	A	B	A	A	H	H	H	H	H	H	H	H	H	H	H	H	H	H	H	H	H	H
	chr12	21589108	A	G	248.855	KS specific	AH	B	A	A	H	H	H	AH	AH	AH	AH	AH	AH	AH	AH	AH	AH	AH	AH	AH	AH	AH
	chr12	21589177	A	G	248.593	KS specific	AH	B	AH	A	H	H	H	AH	AH	AH	AH	AH	AH	AH	AH	AH	AH	AH	AH	AH	AH	AH
	chr01	1118858	T	C	1288.56	IR26 specific	A	A	B	A	A	A	A	H	H	H	H	H	H	H	H	H	H	H	H	H	H	H
	chr01	1118890	G	A	1381.73	IR26 specific	A	A	B	A	A	A	A	H	H	H	H	H	H	H	H	H	H	H	H	H	H	H
	chr01	1118929	G	A	1379.1	IR26 specific	A	A	B	A	A	A	A	H	H	H	H	H	H	H	H	H	H	H	H	H	H	H
	chr01	1119076	C	T	1394.7	IR26 specific	A	A	B	A	A	A	A	H	H	H	H	H	H	H	H	H	H	H	H	H	H	H
	chr01	1119104	A	G	1319.56	IR26 specific	A	A	B	A	A	A	AH	H	H	H	H	H	H	H	H	H	H	H	H	H	H	H
	chr01	1119145	A	G	1330.62	IR26 specific	A	A	B	A	A	A	A	H	H	H	H	H	H	H	H	H	H	H	H	H	H	H
	chr01	2934890	C	G	364.292	IR26 specific	A	A	BH	A	A	A	A	H	A	H	H	H	H	H	H	H	H	H	H	AH	H	H
	chr01	4049534	T	C	3082.12	IR26 specific	A	A	B	A	A	A	A	H	H	H	H	H	H	H	H	H	H	H	H	H	H	H
	chr01	9656430	C	G	3591.8	IR26 specific	A	A	B	A	A	A	A	H	H	H	H	H	H	H	H	H	H	H	H	H	H	H
	chr01	14031939	C	T	1072.19	IR26 specific	A	A	B	AH	A	A	A	H	H	H	H	H	H	H	H	H	H	H	H	H	H	H
	chr01	14032054	G	A	988.831	IR26 specific	A	A	B	A	A	AH	A	H	H	H	H	H	H	H	H	H	H	H	H	H	H	H
	chr01	14462972	C	T	913.682	IR26 specific	A	A	B	A	A	A	A	H	H	H	H	H	H	H	H	H	AH	AH	H	H	AH	H
	chr01	14463030	T	C	913.712	IR26 specific	A	A	B	A	A	A	A	H	H	H	H	H	H	H	H	H	AH	AH	H	H	AH	H
	chr01	17795489	C	T	2541.49	IR26 specific	A	A	B	A	A	A	A	H	H	H	H	H	H	H	H	H	H	H	H	H	H	H
	chr01	17795606	G	A	2259.69	IR26 specific	A	A	B	A	A	A	A	H	H	H	H	H	H	H	H	H	H	H	H	H	H	H
	chr01	17795670	C	A	2469.53	IR26 specific	A	A	B	A	A	A	A	H	H	H	H	H	H	H	H	H	H	H	H	H	H	H
	chr01	17795704	C	G	1848.27	IR26 specific	A	A	BH	A	A	A	A	H	H	H	H	H	H	H	H	H	H	H	H	H	H	H
	chr01	17802008	G	T	1561.9	IR26 specific	A	A	B	A	A	A	A	H	H	H	H	H	H	H	H	H	H	H	H	H	H	H
	chr01	17802079	T	C	1567.95	IR26 specific	A	A	B	A	A	A	A	H	H	H	H	H	H	H	H	H	H	H	H	H	H	H
	chr01	17803964	C	T	436.565	IR26 specific	A	A	B	A	A	A	A	AH	H	H	H	AH	H	AH	H	AH	H	H	H	AH	AH	H
	chr01	17804262	A	G	343.312	IR26 specific	A	A	B	AH	A	A	A	H	AH	AH	AH	H	AH	H	AH	H	AH	H	AH	A	H	H
	chr01	17804773	C	T	1663.5	IR26 specific	A	A	B	A	A	A	A	H	H	H	H	H	H	H	H	H	H	H	H	H	H	H
	chr01	17804822	C	T	1663.5	IR26 specific	A	A	B	A	A	A	A	H	H	H	H	H	H	H	H	H	H	H	H	H	H	H
	chr01	17862647	G	A	1588.62	IR26 specific	A	A	B	A	A	A	A	H	H	H	H	H	H	H	H	H	H	H	H	H	H	H
	chr01	17862682	C	T	1196.14	IR26 specific	A	A	B	A	A	A	A	H	H	H	H	H	H	H	H	H	H	H	H	H	H	H
	chr01	17862683	C	T	1274.33	IR26 specific	A	A	B	A	A	A	A	H	H	H	H	H	H	H	H	H	H	H	H	H	H	H
	chr01	19152948	G	A	2400.87	IR26 specific	A	A	B	A	A	A	AH	H	H	H	H	H	H	H	H	H	H	H	H	H	H	H
	chr01	20941421	T	C	1101.94	IR26 specific	A	A	B	A	A	A	A	H	AH	H	H	H	H	H	H	H	H	AH	H	H	H	H
	chr01	20941642	G	A	1148.25	IR26 specific	A	A	B	A	A	A	A	H	AH	H	H	H	H	H	H	H	H	AH	H	H	H	H
	chr01	22118375	G	A	2781.86	IR26 specific	A	A	B	A	A	A	A	H	H	H	H	AH	H	H	H	H	H	H	H	H	H	H
	chr01	22369192	G	C	3588.44	IR26 specific	A	A	B	A	A	A	A	H	H	H	H	H	H	H	H	H	H	H	H	H	H	H
	chr01	23592465	C	T	611.404	IR26 specific	AH	A	B	A	A	A	A	H	AH	H	AH	H	AH	H	AH	AH	AH	AH	H	AH	AH	H
	chr01	24570087	G	A	1081.33	IR26 specific	A	A	B	A	A	A	A	H	H	H	H	H	H	H	H	H	H	H	H	H	H	H
	chr01	27675364	C	T	2652.6	IR26 specific	A	A	B	A	A	A	A	H	H	H	H	H	H	H	H	H	H	H	H	H	H	H
	chr01	32194315	C	A	1381.8	IR26 specific	A	A	B	A	A	A	A	H	H	A	H	H	H	H	H	H	H	H	H	H	H	A
	chr01	32194316	C	A	1381.73	IR26 specific	A	A	B	A	A	A	A	H	H	A	H	H	H	H	H	H	H	H	H	H	H	A
	chr01	32194363	C	A	1381.73	IR26 specific	A	A	B	A	A	A	A	H	H	A	H	H	H	H	H	H	H	H	H	H	H	A
	chr01	32750352	G	A	3642.82	IR26 specific	A	A	B	A	A	A	A	H	H	H	H	H	H	H	H	H	H	H	H	H	H	H
	chr01	32750403	G	A	1608.13	IR26 specific	A	A	B	A	A	A	A	H	H	H	H	H	H	H	H	H	H	H	H	H	H	H
	chr01	33153239	T	C	1308.89	IR26 specific	A	A	B	A	A	A	A	H	H	H	H	H	H	H	H	AH	AH	H	H	H	H	H
	chr01	36507830	G	A	2593.06	IR26 specific	A	A	B	A	A	A	A	H	H	H	H	A	H	H	H	H	H	H	H	H	H	AH
	chr01	39257243	T	C	1280.92	IR26 specific	A	A	B	A	A	A	A	H	H	H	H	A	H	AH	H	H	H	H	H	H	H	H
	chr01	39380760	G	A	853.306	IR26 specific	A	A	BH	A	A	A	A	H	AH	AH	H	A	H	AH	H	H	H	AH	H	AH	H	H
	chr01	39380833	G	A	863.419	IR26 specific	A	A	BH	A	A	A	A	H	AH	AH	H	A	H	AH	H	H	H	AH	H	AH	H	H
	chr01	41778224	G	A	2880.28	IR26 specific	A	A	B	A	A	A	A	H	H	H	H	A	H	H	H	H	H	H	H	H	H	H
	chr02	778820	G	A	1126.15	IR26 specific	AH	A	B	A	A	A	A	H	AH	AH	H	H	AH	H	H	H	H	AH	H	AH	H	H
	chr02	7857087	G	A	227.5	IR26 specific	A	A	B	A	A	A	A	H	H	H	AH	H	H	AH	AH	AH	H	H	AH	H	AH	AH
	chr02	9648584	C	T	1306.96	IR26 specific	A	A	B	A	A	A	A	H	H	H	H	H	H	H	H	H	H	H	H	AH	H	H
	chr02	14105255	G	A	2088.33	IR26 specific	A	A	B	A	A	A	A	H	H	H	H	H	H	H	H	H	H	H	H	H	H	H
	chr02	14480300	G	A	2194.36	IR26 specific	A	A	B	A	A	AH	AH	H	H	H	H	H	H	H	AH	H	H	H	H	H	H	H
	chr02	14480340	G	A	2178.02	IR26 specific	A	A	B	A	A	AH	A	H	H	H	H	H	H	H	AH	H	H	H	H	H	H	H
	chr02	14753800	C	T	590.108	IR26 specific	A	A	B	A	A	A	A	H	H	H	AH	H	H	H	H	H	H	H	H	H	H	AH
	chr02	16626348	C	T	889.017	IR26 specific	A	A	B	A	A	A	A	H	A	H	H	H	H	H	H	H	H	H	H	H	H	H
	chr02	16776855	G	A	290.732	IR26 specific	A	A	B	A	A	A	A	H	H	H	AH	H	AH	H	AH	AH	H	H	AH	H	H	H
	chr02	16776886	G	A	288.757	IR26 specific	A	A	B	A	A	A	A	H	H	H	AH	H	AH	H	AH	AH	H	H	AH	H	H	H
	chr02	16844225	C	T	335.757	IR26 specific	A	A	B	A	A	A	A	H	H	AH	AH	H	H	H	H	AH	H	H	H	AH	H	AH
	chr02	16844273	T	C	330.999	IR26 specific	A	A	B	A	AH	A	AH	H	H	H	AH	H	H	H	AH	AH	H	H	H	AH	H	AH
	chr02	16844278	C	T	347.984	IR26 specific	A	A	B	A	A	A	A	H	H	AH	AH	H	H	H	AH	AH	H	H	H	AH	H	AH
	chr02	18809204	T	C	1904.06	IR26 specific	A	A	B	A	A	A	A	H	H	AH	H	H	H	H	H	H	H	H	H	H	H	H
	chr02	18809219	A	T	1953.53	IR26 specific	A	A	B	A	A	A	A	H	H	AH	H	H	H	H	H	H	H	H	H	H	H	H
	chr02	18857945	A	G	515.642	IR26 specific	A	A	B	A	A	A	A	H	A	H	H	H	H	A	A	H	H	H	H	H	A	H
	chr02	24022688	C	T	1337.79	IR26 specific	AH	A	B	A	A	A	A	H	H	H	H	H	H	H	H	H	H	H	H	H	H	H
	chr02	24022828	A	G	1391.45	IR26 specific	A	A	B	A	A	A	A	H	H	H	H	H	H	H	H	H	H	H	H	H	H	H
	chr02	24022830	A	G	1486.7	IR26 specific	A	A	B	A	A	A	A	H	H	H	H	H	H	H	H	H	H	H	H	H	H	H
	chr02	26453706	T	C	792.073	IR26 specific	A	A	B	A	A	A	A	H	A	H	H	H	H	H	H	H	AH	H	AH	H	H	H
	chr02	27843635	T	G	778.338	IR26 specific	A	A	B	A	A	AH	A	H	H	H	H	H	H	H	AH	H	H	H	H	AH	H	H
	chr02	27843638	C	T	779.647	IR26 specific	A	A	B	A	A	A	A	H	H	H	H	H	H	H	AH	H	H	H	H	AH	H	H
	chr02	27843686	C	T	1208.65	IR26 specific	A	A	B	A	A	A	A	H	H	H	H	H	H	H	AH	H	H	H	H	H	H	H
	chr02	27843791	C	T	799.827	IR26 specific	A	A	B	A	A	A	A	H	H	H	H	H	H	H	AH	H	H	H	H	H	H	H
	chr02	27939183	C	T	662.06	IR26 specific	A	A	B	A	A	A	A	H	H	H	AH	AH	H	H	AH	H	AH	H	H	H	AH	AH
	chr02	27939185	G	A	717.034	IR26 specific	A	A	B	AH	A	AH	AH	H	H	H	H	AH	H	H	AH	H	H	H	H	H	AH	AH
	chr02	27939277	G	A	641.436	IR26 specific	A	A	B	A	A	A	A	H	H	H	AH	AH	H	H	AH	H	AH	H	H	H	AH	AH
	chr02	27939296	T	C	560.464	IR26 specific	A	A	B	A	A	A	A	H	H	H	AH	AH	H	H	AH	H	AH	H	H	H	AH	AH
	chr02	28160468	A	G	790.332	IR26 specific	A	A	B	A	A	A	A	H	AH	H	H	H	H	AH	AH	AH	A	AH	H	H	H	H
	chr02	28847614	A	G	1173.59	IR26 specific	A	AH	B	A	A	A	A	H	H	H	H	H	AH	AH	H	H	H	H	H	H	H	H
	chr02	28847637	C	T	1153.06	IR26 specific	A	A	B	A	A	A	A	H	H	H	H	H	AH	AH	H	H	H	H	H	H	H	H
	chr02	31072122	C	T	920.395	IR26 specific	A	A	B	A	A	A	A	H	AH	H	AH	H	H	H	AH	H	AH	H	AH	H	AH	H
	chr02	32660292	T	C	3825.09	IR26 specific	A	A	B	A	A	A	A	H	H	H	H	H	H	H	H	H	H	H	H	H	H	H
	chr02	32704946	G	A	3550.31	IR26 specific	A	A	B	A	A	A	A	H	H	H	H	H	H	H	H	H	H	H	H	H	H	H
	chr02	32704947	A	T	3539.95	IR26 specific	A	A	B	A	A	A	A	H	H	H	H	H	H	H	H	H	H	H	H	H	H	H
	chr02	33926825	C	T	1443.94	IR26 specific	A	A	B	A	A	A	A	H	H	H	H	H	H	H	AH	H	H	H	H	H	H	H
	chr02	34781783	C	T	1774.95	IR26 specific	A	A	B	A	A	A	A	H	H	H	H	H	H	H	H	H	H	H	H	H	H	H
	chr02	34781794	G	A	1834.2	IR26 specific	A	A	B	A	A	A	A	H	H	H	H	H	H	H	H	H	H	H	H	H	H	H
	chr02	35820163	A	G	2199.33	IR26 specific	A	A	B	A	A	A	A	H	H	H	H	H	H	H	H	H	H	H	H	H	H	H
	chr03	354978	A	G	334.571	IR26 specific	A	A	B	A	A	A	A	H	AH	A	AH	H	H	AH	H	AH	A	A	H	H	H	H
	chr03	1230068	C	T	3539.73	IR26 specific	A	A	B	A	A	A	A	H	H	H	H	H	H	H	H	H	H	H	H	H	H	H
	chr03	7026202	T	A	2383.36	IR26 specific	A	A	B	A	A	A	A	H	H	H	H	H	H	H	H	H	H	H	H	H	H	H
	chr03	7026203	G	C	2384.38	IR26 specific	A	A	B	A	A	A	A	H	H	H	H	H	H	H	H	H	H	H	H	H	H	H
	chr03	9925689	C	T	1123.86	IR26 specific	A	A	B	A	A	A	A	H	H	H	H	H	H	H	H	H	H	A	H	H	H	H
	chr03	9925713	T	C	987.244	IR26 specific	A	A	B	A	A	A	A	H	H	H	H	H	H	H	H	H	H	A	H	AH	H	H
	chr03	11107981	C	A	928.418	IR26 specific	A	A	B	A	A	A	A	AH	H	H	AH	AH	H	AH	H	H	H	AH	AH	H	H	H
	chr03	11137259	G	A	2459.8	IR26 specific	A	A	B	A	A	A	A	H	H	H	H	H	H	H	H	H	H	H	H	H	H	H
	chr03	12501453	G	A	222.274	IR26 specific	A	A	B	A	A	A	A	AH	AH	H	AH	H	H	H	AH	AH	H	AH	AH	H	H	H
	chr03	12501497	G	A	324.875	IR26 specific	A	A	B	A	A	A	A	AH	AH	H	AH	H	H	H	AH	AH	H	AH	AH	H	H	H
	chr03	12570316	C	T	1315.68	IR26 specific	A	A	B	A	A	A	A	H	H	H	H	H	H	H	H	H	AH	H	H	H	H	H
	chr03	15094218	C	T	563.476	IR26 specific	A	A	B	A	A	A	A	AH	H	H	AH	AH	A	H	H	AH	H	H	AH	AH	H	AH
	chr03	15348159	C	T	390.191	IR26 specific	A	A	B	A	A	A	A	AH	AH	H	H	H	AH	H	AH	H	AH	AH	H	H	H	AH
	chr03	15445198	T	C	3974.52	IR26 specific	A	A	B	A	A	A	A	H	H	H	H	H	H	H	H	H	H	H	H	H	H	H
	chr03	15709850	G	A	2456.28	IR26 specific	A	A	B	A	A	A	A	H	H	H	H	H	H	H	H	H	H	H	H	H	H	H
	chr03	22925919	A	T	1331.64	IR26 specific	A	A	B	A	A	A	A	H	H	H	H	H	H	H	AH	H	AH	H	H	H	H	H
	chr03	22982431	T	C	3516.41	IR26 specific	A	A	B	A	A	A	A	H	H	H	H	H	H	H	H	H	H	H	H	H	H	H
	chr03	23461959	G	A	2876.95	IR26 specific	A	A	B	A	A	A	A	H	H	H	H	H	H	H	H	H	H	H	H	H	H	H
	chr03	23613092	C	T	708.305	IR26 specific	A	A	B	A	A	A	A	AH	H	H	H	H	H	H	H	H	H	H	H	A	H	H
	chr03	23663662	T	C	450.465	IR26 specific	A	A	B	A	A	A	A	AH	H	H	AH	AH	AH	AH	H	AH	H	H	H	AH	AH	AH
	chr03	23726985	G	A	1666.08	IR26 specific	A	A	B	A	A	A	A	H	H	H	H	H	H	H	H	H	H	H	H	H	H	H
	chr03	23727012	A	G	1597.44	IR26 specific	A	A	B	A	A	A	A	H	H	H	H	H	H	H	H	H	H	H	H	H	H	H
	chr03	23727111	G	A	1669.24	IR26 specific	A	A	B	A	A	A	A	H	H	H	H	H	H	H	H	H	H	H	H	H	H	H
	chr03	24312279	G	A	2712.18	IR26 specific	A	A	B	A	A	A	A	H	H	H	H	H	H	H	H	H	H	H	H	H	H	H
	chr03	28321211	C	T	1810.2	IR26 specific	A	A	B	A	A	A	A	H	H	H	H	H	H	H	H	H	H	H	H	H	H	H
	chr03	30436655	A	G	2454.67	IR26 specific	A	A	B	A	A	A	A	H	H	H	H	H	H	H	H	H	H	H	H	H	H	H
	chr03	31608937	G	A	725.37	IR26 specific	A	A	B	A	A	A	A	H	H	H	H	H	H	H	AH	AH	AH	H	H	H	H	AH
	chr03	33249574	G	A	3181.36	IR26 specific	A	A	B	A	A	A	A	H	H	H	H	H	H	H	H	H	H	H	H	H	H	H
	chr04	1004606	T	C	1715.82	IR26 specific	A	A	B	A	A	A	A	H	H	H	H	H	H	H	H	H	H	H	H	H	H	H
	chr04	1004618	G	A	1715.82	IR26 specific	A	A	B	A	A	A	A	H	H	H	H	H	H	H	H	H	H	H	H	H	H	H
	chr04	1004627	C	T	1715.82	IR26 specific	A	A	B	A	A	A	A	H	H	H	H	H	H	H	H	H	H	H	H	H	H	H
	chr04	1004655	G	A	1715.82	IR26 specific	A	A	B	A	A	A	A	H	H	H	H	H	H	H	H	H	H	H	H	H	H	H
	chr04	3957463	G	A	1556.5	IR26 specific	A	A	B	A	A	A	A	H	H	H	H	H	H	H	H	H	H	H	H	H	H	H
	chr04	3957518	C	G	1535.15	IR26 specific	A	A	B	A	A	A	A	H	H	H	H	H	H	H	H	H	H	H	H	H	H	H
	chr04	7474734	G	C	1224.17	IR26 specific	A	A	B	A	A	A	A	H	H	H	H	H	H	H	H	H	H	H	H	H	H	H
	chr04	9078581	A	T	1126.19	IR26 specific	A	A	B	A	A	A	A	AH	H	H	H	H	H	H	H	H	H	H	H	H	AH	H
	chr04	9275265	C	T	3970.59	IR26 specific	A	A	B	A	A	A	A	H	H	H	H	H	H	H	H	H	H	H	H	H	H	H
	chr04	11484905	C	T	1608.52	IR26 specific	A	A	B	A	A	A	A	H	H	H	H	AH	H	H	H	H	H	H	H	H	H	BH
	chr04	12234573	C	T	1319.59	IR26 specific	A	A	B	A	A	A	A	H	H	H	H	H	H	H	H	H	H	H	H	H	H	H
	chr04	13688929	C	T	1306.69	IR26 specific	A	A	B	A	A	A	A	H	H	H	H	H	H	H	H	H	H	H	H	H	H	H
	chr04	13700588	G	A	440.673	IR26 specific	A	A	B	A	A	A	A	AH	H	H	H	H	H	H	AH	H	AH	H	H	H	H	H
	chr04	21605630	C	T	956.716	IR26 specific	A	A	B	A	A	A	A	H	H	AH	H	AH	H	H	H	H	H	H	H	H	AH	H
	chr04	21605637	G	A	954.264	IR26 specific	A	A	B	A	A	A	A	H	H	AH	H	AH	H	H	H	H	H	H	H	H	AH	H
	chr04	21605669	T	C	936.116	IR26 specific	A	A	B	A	A	A	A	H	H	AH	H	AH	H	H	H	H	H	H	H	H	AH	H
	chr04	21605699	C	T	962.839	IR26 specific	A	A	B	AH	A	A	A	H	H	AH	H	AH	H	H	H	H	H	H	H	H	AH	H
	chr04	21605705	A	T	954.977	IR26 specific	A	AH	B	A	A	A	A	H	H	AH	H	AH	H	H	H	H	H	H	H	H	AH	H
	chr04	21605795	A	G	843.142	IR26 specific	A	A	BH	A	A	A	A	H	H	AH	H	AH	H	H	H	H	H	H	H	H	AH	H
	chr04	21605802	G	A	943.792	IR26 specific	A	A	B	A	A	A	A	H	H	AH	H	AH	H	H	H	H	H	H	H	H	AH	H
	chr04	21605831	G	C	1031.33	IR26 specific	A	A	B	A	A	A	A	H	H	AH	H	AH	H	H	H	H	H	H	H	H	AH	H
	chr04	24650453	G	A	3182.01	IR26 specific	A	A	B	A	A	A	A	H	H	H	H	H	H	H	H	H	H	H	H	H	H	H
	chr04	24762951	G	A	1018.23	IR26 specific	A	A	B	A	A	A	A	H	H	H	AH	H	H	H	H	H	AH	H	H	H	H	H
	chr04	25203431	C	T	1459.75	IR26 specific	A	A	B	A	A	A	A	H	H	H	H	H	H	H	H	H	H	H	H	H	H	H
	chr04	25203433	A	G	1419.63	IR26 specific	A	A	B	A	A	A	A	H	H	H	H	H	H	H	H	H	H	AH	H	H	H	H
	chr04	25203470	G	A	1399.79	IR26 specific	A	A	B	A	A	A	A	H	H	H	H	H	H	H	H	H	H	AH	H	H	H	H
	chr04	28188481	C	A	3177.41	IR26 specific	A	A	B	A	A	A	A	H	H	H	H	H	H	H	H	H	H	H	H	H	H	H
	chr04	28420053	G	A	1029.59	IR26 specific	A	A	B	A	A	A	A	H	H	H	H	A	H	H	H	H	A	H	H	AH	H	H
	chr04	28894493	A	T	2352.59	IR26 specific	A	A	B	A	A	A	A	H	H	H	H	H	H	H	H	H	H	H	H	H	H	H
	chr04	29245452	G	A	371.176	IR26 specific	A	A	B	A	A	A	A	H	H	H	H	H	H	H	H	AH	H	H	H	H	AH	H
	chr04	29245453	C	T	392.035	IR26 specific	A	A	B	A	A	A	A	H	H	H	H	H	H	H	H	AH	H	H	H	H	AH	H
	chr04	29245463	C	T	932.955	IR26 specific	A	A	B	A	A	A	A	H	H	H	H	H	H	H	H	AH	H	H	H	H	H	H
	chr04	29245519	C	T	932.892	IR26 specific	A	A	B	A	A	A	A	H	H	H	H	H	H	H	H	AH	H	H	H	H	H	H
	chr04	29245529	A	G	929.937	IR26 specific	A	A	B	A	A	A	A	H	H	H	H	H	H	H	H	AH	H	H	H	H	H	H
	chr04	29550578	C	T	293.917	IR26 specific	A	A	B	A	A	A	A	AH	A	A	AH	H	AH	A	AH	H	H	H	AH	H	A	H
	chr04	29997639	T	A	2839	IR26 specific	A	A	B	A	A	A	A	H	H	H	H	H	H	H	H	H	H	H	H	H	H	H
	chr04	29997759	C	T	1399.14	IR26 specific	A	A	B	A	A	A	A	H	H	H	H	H	H	H	H	H	H	H	H	H	H	H
	chr04	30116382	G	A	1146.43	IR26 specific	A	A	B	A	A	A	A	H	H	H	H	H	AH	H	H	H	AH	H	H	H	H	H
	chr04	31454304	C	T	1924.71	IR26 specific	A	A	B	A	A	A	A	H	H	H	H	H	H	H	H	H	H	H	H	H	H	H
	chr04	33661659	T	C	2163.43	IR26 specific	A	A	B	A	A	A	A	H	H	H	H	H	H	H	H	H	H	H	H	H	H	H
	chr04	33866791	C	T	1183.04	IR26 specific	A	A	B	A	A	A	A	H	AH	AH	H	H	AH	H	H	H	H	H	H	AH	AH	H
	chr04	33866859	C	A	1517.11	IR26 specific	A	A	B	A	A	A	A	H	H	H	H	H	AH	H	H	H	H	H	H	H	AH	H
	chr04	35344191	A	G	3124.55	IR26 specific	A	A	B	A	A	A	A	H	H	H	H	H	H	H	H	H	H	H	H	H	H	H
	chr04	35344214	G	A	3137.59	IR26 specific	A	A	B	A	A	A	A	H	H	H	H	H	H	H	H	H	H	H	H	H	H	H
	chr04	35344265	G	T	3140.61	IR26 specific	A	A	B	A	A	A	A	H	H	H	H	H	H	H	H	H	H	H	H	H	H	H
	chr05	2094228	T	G	1033.89	IR26 specific	A	A	B	A	A	A	A	H	H	H	H	H	H	H	AH	H	H	H	H	H	H	H
	chr05	2094292	A	C	1250.85	IR26 specific	A	A	B	A	A	A	A	H	H	H	H	H	H	H	AH	H	H	H	H	H	H	H
	chr05	3892734	C	T	1795.32	IR26 specific	A	A	B	A	A	A	A	H	H	H	H	H	H	H	H	H	H	H	H	H	H	H
	chr05	3892752	C	T	1728.51	IR26 specific	A	A	B	A	A	A	A	H	H	H	H	H	H	H	H	H	H	H	H	H	H	H
	chr05	3966142	C	T	3715.66	IR26 specific	A	A	B	A	A	A	A	H	H	H	H	H	H	H	H	H	H	H	H	H	H	H
	chr05	4284393	A	G	2752.51	IR26 specific	A	A	B	A	A	A	A	H	H	H	H	H	H	H	H	H	H	H	H	H	H	H
	chr05	4284408	C	T	2825.33	IR26 specific	A	A	B	A	A	A	A	H	H	H	H	H	H	H	H	H	H	H	H	H	H	H
	chr05	5878328	T	C	3800.05	IR26 specific	A	A	B	A	A	A	A	H	H	H	H	H	H	H	H	H	H	H	H	H	H	H
	chr05	5878329	T	A	3801.13	IR26 specific	A	A	B	A	A	A	A	H	H	H	H	H	H	H	H	H	H	H	H	H	H	H
	chr05	5878436	T	C	3801.05	IR26 specific	A	A	B	A	A	A	A	H	H	H	H	H	H	H	H	H	H	H	H	H	H	H
	chr05	8842531	C	T	999.239	IR26 specific	A	A	B	A	A	A	A	H	H	H	H	H	AH	H	H	H	AH	H	H	H	H	H
	chr05	8842540	G	A	899.537	IR26 specific	A	A	B	A	A	AH	A	H	H	H	H	H	AH	H	H	H	AH	H	H	H	H	H
	chr05	8891941	C	T	1450.42	IR26 specific	A	A	B	A	A	A	A	H	H	H	H	A	H	H	H	H	H	H	H	H	H	H
	chr05	13586998	G	A	362.729	IR26 specific	A	A	B	A	A	A	A	AH	H	H	AH	AH	AH	AH	H	H	H	AH	AH	AH	AH	AH
	chr05	14005588	A	T	977.933	IR26 specific	A	A	B	A	A	A	A	AH	H	H	H	AH	H	H	H	H	H	A	H	A	H	H
	chr05	14159537	C	T	2048.24	IR26 specific	A	A	B	A	A	A	A	H	H	H	H	H	H	H	H	H	H	H	H	H	H	H
	chr05	14743764	C	T	503.4	IR26 specific	A	A	B	A	A	A	A	H	H	H	H	H	H	AH	H	AH	H	A	H	H	H	AH
	chr05	15495655	A	C	427.212	IR26 specific	A	A	B	A	A	A	A	AH	H	AH	H	H	H	H	H	H	H	A	H	AH	H	AH
	chr05	15495657	C	T	447.448	IR26 specific	A	A	B	A	A	A	A	AH	H	AH	H	H	H	H	H	H	H	A	H	AH	H	AH
	chr05	15495749	G	A	432.133	IR26 specific	A	A	B	A	A	A	A	AH	H	AH	H	H	H	H	H	H	H	A	H	AH	H	AH
	chr05	15495759	A	T	725.663	IR26 specific	A	A	B	A	A	A	A	AH	H	AH	H	H	H	H	H	H	H	A	H	AH	H	AH
	chr05	15495828	T	C	305.021	IR26 specific	A	A	B	A	A	A	A	H	H	AH	H	H	H	AH	H	H	H	A	H	AH	H	AH
	chr05	16156843	C	T	1461.74	IR26 specific	A	A	B	A	A	A	A	H	H	H	H	H	H	H	H	H	H	H	AH	H	H	H
	chr05	22573438	G	A	3974.19	IR26 specific	A	A	B	A	A	A	A	H	H	H	H	H	H	H	H	H	H	H	H	H	H	H
	chr05	22593586	G	A	2488.61	IR26 specific	A	A	B	A	A	A	A	H	H	H	H	H	H	H	H	H	H	H	H	H	H	H
	chr05	22593590	C	T	2437.79	IR26 specific	A	A	B	A	A	A	A	H	H	H	H	H	H	H	H	H	H	H	H	H	H	H
	chr05	22593596	G	T	2360.03	IR26 specific	A	A	BH	A	A	A	A	H	H	H	H	H	H	H	H	H	H	H	H	H	H	H
	chr05	23102774	G	A	651.756	IR26 specific	A	A	B	A	A	A	A	H	H	AH	AH	AH	H	H	H	H	H	H	H	H	H	AH
	chr05	27019219	C	T	476.363	IR26 specific	A	A	B	A	A	A	A	H	H	H	H	AH	AH	H	H	H	AH	H	H	H	AH	H
	chr05	27363141	C	G	1859.32	IR26 specific	A	A	B	A	A	A	A	H	H	H	H	H	H	H	A	A	A	A	A	A	A	A
	chr05	27414828	C	T	2240.14	IR26 specific	A	A	B	A	A	A	A	H	H	AH	H	H	H	H	H	H	H	H	H	H	H	H
	chr05	27438759	G	A	1365.75	IR26 specific	A	AH	B	A	A	A	A	H	H	H	H	H	H	AH	H	H	H	H	H	H	H	H
	chr06	413702	A	G	2817.51	IR26 specific	A	A	B	A	A	A	A	H	H	H	H	H	H	H	H	H	H	H	H	H	H	H
	chr06	1359270	A	G	3543.46	IR26 specific	A	A	B	A	A	A	A	H	H	H	H	H	H	H	H	H	H	H	H	H	H	H
	chr06	1359360	A	T	2445.71	IR26 specific	A	A	B	A	A	A	A	H	H	H	AH	H	AH	H	AH	H	H	H	AH	AH	AH	H
	chr06	1561312	A	G	2449.97	IR26 specific	A	A	B	A	A	A	A	H	H	H	H	H	H	H	H	H	H	H	H	H	H	H
	chr06	1561313	C	G	2349.17	IR26 specific	A	A	B	A	A	A	A	H	H	H	H	H	H	H	H	H	H	H	H	H	H	H
	chr06	1561326	A	C	2461.07	IR26 specific	A	A	B	A	A	A	A	H	H	H	H	H	H	H	H	H	H	H	H	H	H	H
	chr06	1561436	C	A	3657.35	IR26 specific	A	A	B	A	A	A	A	H	H	H	H	H	H	H	H	H	H	H	H	H	H	H
	chr06	2887226	T	A	350.904	IR26 specific	AH	A	B	A	A	A	A	AH	AH	H	AH	AH	H	H	AH	AH	AH	H	AH	H	AH	AH
	chr06	2887231	G	A	506.498	IR26 specific	A	A	B	A	A	A	A	AH	H	H	AH	AH	H	H	AH	AH	AH	H	H	H	AH	AH
	chr06	2887274	T	A	445.755	IR26 specific	A	A	B	A	A	A	A	AH	H	H	AH	AH	H	H	AH	AH	AH	H	AH	H	AH	AH
	chr06	7141452	C	T	1553.14	IR26 specific	A	A	B	A	A	A	A	H	H	H	H	H	H	H	H	H	H	H	H	H	H	H
	chr06	7141460	G	T	1553.15	IR26 specific	A	A	B	A	A	A	A	H	H	H	H	H	H	H	H	H	H	H	H	H	H	H
	chr06	7141507	C	T	1553.18	IR26 specific	A	A	B	A	A	A	A	H	H	H	H	H	H	H	H	H	H	H	H	H	H	H
	chr06	7483017	A	G	634.688	IR26 specific	A	A	B	A	A	A	A	H	H	H	H	H	H	H	H	H	H	H	H	H	H	H
	chr06	7483028	T	C	632.721	IR26 specific	A	A	B	A	A	A	A	H	H	H	H	H	H	H	H	H	H	H	H	H	H	H
	chr06	7483048	A	G	640.533	IR26 specific	A	A	B	A	A	A	A	H	H	H	H	H	H	H	H	H	H	H	H	H	H	H
	chr06	7483122	A	T	641.637	IR26 specific	A	A	B	A	A	A	A	H	H	H	H	H	H	H	H	H	H	H	H	H	H	H
	chr06	7483164	T	C	645.631	IR26 specific	A	A	B	A	A	A	A	H	H	H	H	H	H	H	H	H	H	H	H	H	H	H
	chr06	7483166	A	G	650.947	IR26 specific	A	A	B	A	A	A	A	H	H	H	H	H	H	H	H	H	H	H	H	H	H	H
	chr06	7483178	T	C	644.438	IR26 specific	A	A	B	A	A	A	A	H	H	H	H	H	H	H	H	H	H	H	H	H	H	H
	chr06	9670496	A	T	3336.93	IR26 specific	A	A	B	A	A	A	A	H	H	H	H	H	H	H	H	H	H	H	H	H	H	H
	chr06	9881773	G	A	673.586	IR26 specific	AH	AH	BH	A	AH	AH	AH	H	H	H	H	H	H	H	H	H	H	H	H	H	H	H
	chr06	10885553	T	C	1637.3	IR26 specific	A	A	B	A	A	A	A	H	H	H	H	H	H	H	H	H	H	H	H	H	H	H
	chr06	10885587	G	A	3412.46	IR26 specific	AH	A	B	AH	A	A	A	H	H	H	H	H	H	H	H	H	H	H	H	H	H	H
	chr06	10885596	A	G	3435.98	IR26 specific	A	A	B	A	A	A	A	H	H	H	H	H	H	H	H	H	H	H	H	H	H	H
	chr06	11384253	A	C	1452.54	IR26 specific	A	A	BH	A	A	A	A	H	H	H	H	H	H	H	H	H	H	H	H	H	H	H
	chr06	11384409	C	A	1543.52	IR26 specific	A	A	BH	A	A	A	A	H	H	H	H	H	H	H	H	H	H	H	H	H	H	H
	chr06	12943060	G	A	1760.23	IR26 specific	A	A	B	A	A	A	A	H	H	H	H	H	H	H	H	H	H	H	H	H	H	H
	chr06	15531863	A	T	3553.92	IR26 specific	A	A	B	A	A	A	A	H	H	H	H	H	H	H	H	H	H	H	H	H	H	H
	chr06	16397174	T	A	1054.48	IR26 specific	A	A	B	A	A	A	A	H	H	H	H	H	H	H	AH	H	H	H	H	H	AH	H
	chr06	17620392	C	T	2829.33	IR26 specific	A	A	B	A	A	A	A	H	H	H	H	H	H	H	H	H	H	H	H	H	H	H
	chr06	19918026	A	T	735.727	IR26 specific	A	A	B	A	A	A	A	H	H	H	H	AH	H	AH	H	H	H	H	H	H	H	H
	chr06	19918055	G	A	729.38	IR26 specific	A	A	B	A	A	A	A	H	H	H	H	AH	H	AH	H	H	H	H	H	H	H	H
	chr06	20450013	C	G	1507.22	IR26 specific	A	A	B	A	A	A	A	H	H	H	H	H	H	H	H	H	H	H	H	H	H	H
	chr06	24498630	G	A	3397.16	IR26 specific	A	A	B	A	A	A	A	H	H	H	H	H	H	H	H	H	H	H	H	H	H	H
	chr06	25111601	G	C	2329.94	IR26 specific	A	A	B	A	A	A	A	H	H	H	H	H	H	H	H	H	H	H	H	H	H	H
	chr06	26312888	G	A	2694.67	IR26 specific	A	A	B	A	A	A	A	H	H	H	H	H	H	H	H	H	H	H	H	AH	H	H
	chr06	28644946	C	A	494.755	IR26 specific	A	A	B	A	A	A	A	AH	H	H	AH	H	AH	H	AH	H	AH	H	H	H	AH	H
	chr06	29032110	G	T	3089.66	IR26 specific	A	A	B	A	A	A	A	H	H	H	H	H	H	H	H	H	H	H	H	H	H	H
	chr06	30232146	G	T	246.484	IR26 specific	A	A	BH	A	A	A	A	H	H	AH	H	H	H	AH	H	H	AH	H	H	H	H	AH
	chr07	3471496	G	T	1417.87	IR26 specific	A	A	B	A	A	A	A	H	H	H	H	H	H	H	H	H	H	H	H	H	H	H
	chr07	4178586	A	G	1180.95	IR26 specific	A	A	B	A	A	A	A	H	H	H	H	H	H	H	H	H	H	H	H	H	H	H
	chr07	4178766	C	T	1050.02	IR26 specific	A	A	BH	A	A	A	A	H	H	H	H	H	AH	H	H	H	H	H	H	H	H	H
	chr07	4428149	G	C	1140.54	IR26 specific	A	A	B	A	A	A	A	H	H	H	H	H	A	H	H	H	A	H	H	H	AH	H
	chr07	4455989	T	G	3388.46	IR26 specific	A	A	B	A	A	A	A	H	H	H	H	H	H	H	H	H	H	H	H	H	H	H
	chr07	4757079	G	A	1550.38	IR26 specific	A	A	B	A	A	A	A	H	H	H	H	H	H	H	H	H	H	H	H	H	H	H
	chr07	4827417	A	C	2242.63	IR26 specific	A	A	B	A	A	A	A	H	H	H	H	H	H	H	H	H	H	H	H	H	H	H
	chr07	5261376	G	A	3454.74	IR26 specific	A	A	B	A	A	A	A	H	H	H	H	H	H	H	H	H	H	H	H	H	H	H
	chr07	5860664	C	T	1264.41	IR26 specific	A	A	B	A	A	A	A	H	H	H	H	H	H	H	H	H	H	H	H	H	H	H
	chr07	8164363	A	G	3283.46	IR26 specific	A	AH	BH	A	AH	H	AH	H	H	H	H	H	H	H	H	H	H	H	H	H	H	H
	chr07	8440257	C	T	1089.76	IR26 specific	A	A	BH	A	A	A	A	H	H	AH	H	H	H	H	H	H	H	H	H	AH	H	H
	chr07	8447822	G	A	256.452	IR26 specific	A	A	B	A	A	A	A	H	AH	H	AH	AH	AH	H	AH	H	AH	AH	AH	AH	AH	AH
	chr07	16160684	C	T	510.631	IR26 specific	A	A	B	A	A	A	A	H	H	H	H	H	H	H	H	H	H	H	H	H	AH	H
	chr07	17463662	G	A	3709.59	IR26 specific	A	A	B	A	A	A	AH	H	H	H	H	H	H	H	H	H	H	H	H	H	H	H
	chr07	20729445	A	C	1853.82	IR26 specific	A	A	B	A	A	A	A	H	H	H	H	H	H	H	H	H	H	H	H	H	H	H
	chr07	23444256	G	A	619.619	IR26 specific	A	A	B	A	A	A	A	AH	AH	H	AH	H	H	H	AH	H	H	H	AH	H	AH	H
	chr07	24358691	C	T	1172.66	IR26 specific	A	A	B	A	A	A	A	H	H	H	H	H	H	H	H	H	H	H	H	A	H	H
	chr07	26368365	G	A	391.767	IR26 specific	A	A	B	A	A	A	AH	AH	H	AH	AH	AH	AH	AH	AH	AH	AH	H	AH	H	AH	AH
	chr07	26368401	G	A	578.432	IR26 specific	AH	A	BH	A	A	A	A	AH	H	AH	AH	AH	AH	AH	AH	AH	AH	H	AH	H	AH	AH
	chr07	27753196	G	A	3974.42	IR26 specific	A	A	B	A	A	A	A	H	H	H	H	H	H	H	H	H	H	H	H	H	H	H
	chr07	27753213	C	A	3974.42	IR26 specific	A	A	B	A	A	A	A	H	H	H	H	H	H	H	H	H	H	H	H	H	H	H
	chr08	5032728	T	G	1030.61	IR26 specific	A	A	B	A	A	A	A	H	H	H	H	H	H	H	H	H	H	H	H	H	H	H
	chr08	5968106	G	A	867.823	IR26 specific	A	A	B	A	A	A	A	H	H	H	H	H	H	H	H	H	H	AH	H	H	H	AH
	chr08	8455492	G	A	1302.36	IR26 specific	A	A	B	A	A	A	A	H	H	H	H	H	H	AH	H	H	H	A	H	H	H	AH
	chr08	8455529	C	T	971.95	IR26 specific	A	A	BH	A	A	A	A	H	H	H	H	H	H	AH	H	H	H	H	H	H	H	AH
	chr08	9306473	C	T	1967.07	IR26 specific	A	A	B	A	A	A	A	H	H	H	H	H	H	H	H	H	H	H	H	H	H	H
	chr08	9306492	C	T	1961.92	IR26 specific	A	A	B	A	A	A	A	H	H	H	H	H	H	H	H	H	H	H	H	H	H	H
	chr08	9306638	C	T	1745.84	IR26 specific	A	A	B	A	A	A	A	H	H	H	H	H	H	H	H	H	H	H	H	H	H	H
	chr08	9306721	G	A	1954.83	IR26 specific	A	A	B	A	A	A	A	H	H	H	H	H	H	H	H	H	H	H	H	H	H	H
	chr08	10309959	A	G	1593.38	IR26 specific	A	A	B	A	A	A	A	AH	H	H	H	H	H	H	H	H	H	H	H	H	H	H
	chr08	11644400	G	A	598.868	IR26 specific	A	A	B	A	A	A	A	AH	AH	H	H	H	AH	H	AH	AH	H	AH	H	AH	H	AH
	chr08	11783593	C	T	886.66	IR26 specific	A	A	B	A	A	A	A	H	H	H	H	H	H	H	H	H	H	AH	H	H	H	H
	chr08	11783722	C	T	877.847	IR26 specific	A	A	B	A	A	A	A	H	H	H	H	H	H	H	H	H	H	AH	H	H	H	H
	chr08	12149846	T	C	1506.07	IR26 specific	A	A	B	A	A	A	A	H	H	H	H	H	H	H	H	H	H	H	H	H	H	H
	chr08	12149859	C	G	1516.11	IR26 specific	A	A	B	A	A	A	A	H	H	H	H	H	H	H	H	H	H	H	H	H	H	H
	chr08	12149881	G	A	2938.37	IR26 specific	A	A	B	A	A	A	A	H	H	H	H	H	H	H	H	H	H	H	H	H	H	H
	chr08	12150009	C	T	1494.36	IR26 specific	A	A	B	A	A	A	A	H	H	H	H	H	H	H	H	H	H	H	H	H	H	H
	chr08	12565403	G	A	876.648	IR26 specific	A	A	B	A	A	A	A	H	H	AH	H	H	H	H	H	AH	H	H	H	A	H	H
	chr08	13779538	C	G	417.228	IR26 specific	A	A	BH	A	A	A	A	H	H	AH	AH	AH	AH	H	AH	AH	H	AH	AH	H	AH	H
	chr08	14083537	A	C	1008.89	IR26 specific	A	A	B	A	A	A	A	H	H	H	H	H	H	H	H	H	H	H	H	H	H	AH
	chr08	18173308	G	T	582.696	IR26 specific	A	A	B	A	A	A	A	AH	H	H	AH	AH	H	AH	AH	AH	H	H	H	H	H	AH
	chr08	19150875	A	G	2288.85	IR26 specific	A	A	B	A	A	A	A	H	H	AH	H	H	H	H	H	H	H	H	H	H	H	H
	chr08	19214255	G	A	227.482	IR26 specific	A	A	B	A	A	A	A	H	AH	AH	AH	AH	AH	AH	AH	AH	AH	AH	AH	AH	AH	H
	chr08	20391186	C	T	1109.49	IR26 specific	A	A	B	A	A	A	A	H	H	H	H	H	H	H	H	H	H	H	H	H	H	H
	chr08	20926335	G	A	841.215	IR26 specific	A	A	B	A	A	A	A	H	H	H	H	AH	H	H	H	H	H	H	H	AH	H	H
	chr08	20926417	C	T	908.642	IR26 specific	A	A	B	A	A	A	A	H	H	H	H	H	H	H	H	H	H	H	H	AH	H	H
	chr08	20926613	G	A	873.903	IR26 specific	A	A	B	A	A	A	A	H	H	H	H	H	H	H	H	H	H	H	H	AH	H	H
	chr08	20941296	C	G	1844.03	IR26 specific	A	A	B	A	A	A	A	H	H	H	H	H	H	A	H	H	H	H	H	H	H	H
	chr08	20984938	G	A	3973.71	IR26 specific	A	A	B	A	A	A	A	H	H	H	H	H	H	H	H	H	H	H	H	H	H	H
	chr08	23485673	G	A	2589.4	IR26 specific	A	A	B	A	A	A	A	H	H	H	H	H	H	H	H	H	H	H	H	H	H	H
	chr09	453119	C	T	1540.12	IR26 specific	A	A	B	A	A	A	A	H	H	H	H	H	H	H	H	H	H	H	H	H	H	H
	chr09	2567069	G	T	811.311	IR26 specific	A	A	B	A	AH	A	A	H	H	H	H	H	H	H	H	H	AH	H	AH	H	H	H
	chr09	3202935	C	T	926.63	IR26 specific	A	A	B	A	A	A	A	H	H	H	H	H	H	H	H	H	H	H	A	A	H	A
	chr09	5411469	G	A	501.59	IR26 specific	A	A	B	A	A	A	A	H	AH	H	H	H	H	H	AH	AH	AH	H	H	AH	H	AH
	chr09	5411471	C	T	501.525	IR26 specific	A	A	B	A	A	A	A	H	AH	H	H	H	H	H	AH	AH	AH	H	H	AH	H	AH
	chr09	5411503	A	G	501.512	IR26 specific	A	A	B	A	A	A	A	H	AH	H	H	H	H	H	AH	AH	AH	H	H	AH	H	AH
	chr09	5411514	G	C	501.525	IR26 specific	A	A	B	A	A	A	A	H	AH	H	H	H	H	H	AH	AH	AH	H	H	AH	H	AH
	chr09	5411539	T	C	492.448	IR26 specific	A	A	B	A	A	A	A	AH	AH	H	H	H	H	H	AH	AH	AH	H	H	AH	H	AH
	chr09	11036104	C	T	505.047	IR26 specific	A	A	B	A	A	A	A	H	H	H	H	H	H	H	H	H	H	H	H	H	H	AH
	chr09	11036118	C	T	505.155	IR26 specific	A	A	B	A	A	A	A	H	H	H	H	H	H	H	H	H	H	H	H	H	H	AH
	chr09	11036122	C	G	505.179	IR26 specific	A	A	B	A	A	A	A	H	H	H	H	H	H	H	H	H	H	H	H	H	H	AH
	chr09	11036128	C	T	505.089	IR26 specific	A	A	B	A	A	A	A	H	H	H	H	H	H	H	H	H	H	H	H	H	H	AH
	chr09	13329639	T	C	3974.65	IR26 specific	A	A	B	A	A	A	A	H	H	H	H	H	H	H	H	H	H	H	H	H	H	H
	chr09	17288939	G	T	1055.67	IR26 specific	A	A	B	A	A	A	A	H	H	H	A	H	H	H	H	H	H	H	H	H	H	H
	chr09	17678467	G	A	1995.52	IR26 specific	A	A	B	A	A	A	A	H	H	H	H	H	H	H	H	H	A	H	AH	H	H	H
	chr09	17678491	G	A	2005.79	IR26 specific	A	A	B	A	A	A	A	H	H	H	H	H	H	H	H	H	A	H	AH	H	H	H
	chr10	1163876	A	G	3937.59	IR26 specific	A	A	BH	A	A	A	A	H	H	H	H	H	H	H	H	H	H	H	H	H	H	H
	chr10	5427386	G	A	1512.61	IR26 specific	A	A	B	A	A	A	A	H	H	H	H	H	A	H	A	H	H	H	H	H	H	H
	chr10	6388179	G	A	777.278	IR26 specific	A	A	B	A	A	A	A	H	H	H	H	H	H	H	H	H	AH	H	A	H	H	H
	chr10	6388198	G	A	731.395	IR26 specific	A	A	B	A	A	A	A	H	H	H	H	H	H	H	H	H	AH	H	A	H	H	H
	chr10	6450513	T	A	200.39	IR26 specific	A	A	B	A	A	A	A	AH	AH	AH	H	AH	H	H	AH	AH	H	AH	H	H	AH	H
	chr10	6957079	C	A	777.561	IR26 specific	A	A	B	A	A	A	A	H	H	H	AH	H	H	H	H	H	A	AH	AH	H	H	H
	chr10	7534009	C	T	2075.59	IR26 specific	A	A	B	AH	AH	A	A	H	H	H	H	H	H	H	H	H	H	H	H	H	H	H
	chr10	8321883	G	A	1307.5	IR26 specific	AH	A	B	A	A	A	A	H	H	H	H	H	H	H	H	H	H	AH	H	H	H	H
	chr10	8809273	C	T	403.727	IR26 specific	A	AH	B	A	AH	A	AH	AH	H	AH	AH	AH	AH	H	H	H	H	H	H	AH	H	H
	chr10	8809347	C	T	408.261	IR26 specific	A	A	B	A	A	A	A	H	AH	AH	AH	AH	AH	H	H	H	H	H	H	AH	H	H
	chr10	9162835	G	T	1605.11	IR26 specific	A	A	B	A	A	A	A	H	H	H	H	H	H	H	H	H	H	H	H	H	H	H
	chr10	9492259	G	T	1321.83	IR26 specific	A	A	B	A	A	A	A	H	H	H	H	H	H	H	AH	H	H	H	H	H	H	H
	chr10	11194996	C	A	1172.26	IR26 specific	A	A	B	A	A	A	A	H	H	H	H	H	H	H	H	H	H	AH	H	H	H	H
	chr10	11830036	C	T	727.242	IR26 specific	A	A	B	A	A	A	A	AH	H	H	H	H	H	H	H	H	H	H	AH	H	H	H
	chr10	11869854	A	T	974.384	IR26 specific	A	A	B	A	A	A	A	H	H	H	H	AH	H	H	AH	H	H	H	H	H	H	H
	chr10	11869894	G	A	927.009	IR26 specific	A	A	B	A	A	A	A	H	H	H	H	AH	H	H	AH	H	H	H	H	H	H	H
	chr10	11869952	C	T	1519.67	IR26 specific	A	A	B	A	A	A	A	H	H	H	H	AH	H	H	AH	H	H	H	H	H	H	H
	chr10	13292111	A	G	1406.36	IR26 specific	A	A	B	A	A	AH	A	H	H	H	H	H	H	H	H	H	H	H	H	H	H	H
	chr10	13304562	T	C	2780.48	IR26 specific	A	A	B	A	A	A	A	H	H	H	H	H	H	H	H	H	H	H	H	H	H	H
	chr10	20595919	C	A	998.171	IR26 specific	A	A	B	A	A	A	A	H	H	AH	H	H	H	H	H	H	H	H	H	H	H	H
	chr10	20849409	A	G	1535.57	IR26 specific	A	A	B	A	A	A	A	H	AH	H	H	H	H	H	H	H	H	H	H	H	H	H
	chr10	20849416	T	C	1537.58	IR26 specific	A	A	B	A	A	A	A	H	AH	H	H	H	H	H	H	H	H	H	H	H	H	H
	chr10	21159010	G	A	2060.3	IR26 specific	A	A	B	A	A	A	A	H	H	H	H	H	H	H	H	H	H	H	H	H	H	H
	chr10	21159033	G	A	2168.37	IR26 specific	A	A	B	AH	A	A	A	H	H	H	H	H	H	H	H	H	H	H	H	H	H	H
	chr10	21159159	C	T	2135.13	IR26 specific	A	A	B	A	A	A	A	H	H	H	H	H	H	H	H	H	H	H	H	H	H	H
	chr10	22140225	G	A	1307.3	IR26 specific	A	A	B	A	A	A	A	H	H	H	H	H	H	H	H	H	H	H	H	H	H	H
	chr10	22140684	G	A	1559.66	IR26 specific	A	A	B	A	A	A	A	H	H	H	H	H	H	H	H	H	H	H	H	H	H	H
	chr10	22144422	T	C	3039.14	IR26 specific	A	A	B	A	A	A	A	H	H	H	H	H	H	H	H	H	H	H	H	H	H	H
	chr10	22144459	C	T	3026.03	IR26 specific	A	A	BH	A	A	A	A	H	H	H	H	H	H	H	H	H	H	H	H	H	H	H
	chr10	22832949	C	A	235.934	IR26 specific	A	A	B	A	A	A	A	AH	A	AH	AH	H	AH	A	AH	AH	H	A	AH	A	H	A
	chr10	22833022	C	T	258.272	IR26 specific	A	A	B	A	A	A	A	AH	A	AH	AH	H	AH	A	AH	AH	AH	A	AH	A	H	A
	chr11	365340	C	T	1451.5	IR26 specific	A	A	B	A	A	A	A	H	H	H	H	A	H	H	H	H	H	H	H	H	H	H
	chr11	4891340	T	C	1324.98	IR26 specific	A	A	B	A	A	A	A	H	H	H	H	H	H	H	H	H	H	H	H	H	H	H
	chr11	5650996	C	T	1207.74	IR26 specific	A	A	B	A	A	A	A	H	H	H	H	H	H	H	H	AH	H	H	H	H	H	H
	chr11	6651310	C	G	3962.12	IR26 specific	A	A	B	A	A	A	A	H	H	H	H	H	H	H	H	H	H	H	H	H	H	H
	chr11	7722261	C	T	1616.15	IR26 specific	A	A	B	A	A	A	AH	H	H	H	H	H	H	H	H	H	H	H	H	H	H	H
	chr11	7722265	G	A	1586.02	IR26 specific	A	A	B	A	A	A	A	H	H	H	H	H	H	H	H	H	H	H	H	H	H	H
	chr11	7722287	G	A	1669.02	IR26 specific	A	A	B	A	A	A	A	H	H	H	H	H	H	H	H	H	H	H	H	H	H	H
	chr11	8645618	C	T	1429.12	IR26 specific	A	A	B	A	A	A	A	H	H	H	H	H	H	H	H	H	H	H	H	H	H	H
	chr11	8941642	A	G	1315.79	IR26 specific	A	A	B	A	A	A	A	H	H	AH	H	H	H	H	H	H	AH	H	H	H	H	H
	chr11	8941677	C	A	1301.41	IR26 specific	A	A	B	A	A	A	A	H	H	AH	H	H	H	H	H	H	AH	H	H	H	H	H
	chr11	9204838	T	G	2182.05	IR26 specific	A	A	B	A	A	A	A	H	H	H	H	H	H	A	H	H	H	H	H	H	H	H
	chr11	9204898	C	T	2217.38	IR26 specific	A	A	B	A	A	A	A	H	H	H	H	H	H	A	H	H	H	H	H	H	H	H
	chr11	9311586	G	C	2145.17	IR26 specific	A	A	B	A	A	A	A	H	H	H	H	H	H	H	A	H	AH	H	H	H	H	H
	chr11	10831564	A	G	1143.28	IR26 specific	A	A	B	A	A	A	A	H	H	H	H	H	H	H	H	H	H	H	H	H	H	H
	chr11	11557172	G	T	2094.68	IR26 specific	A	A	B	A	A	A	A	H	H	H	H	H	H	H	H	H	H	H	H	H	H	H
	chr11	13319591	G	A	756.688	IR26 specific	A	A	B	A	A	A	A	H	H	H	H	H	H	H	H	H	H	H	H	H	H	H
	chr11	13328042	G	A	1324.85	IR26 specific	A	A	B	A	A	A	A	H	H	H	H	H	H	H	H	H	H	A	H	H	H	H
	chr11	13554570	C	A	2072.21	IR26 specific	A	A	B	A	A	A	A	H	H	H	H	H	H	H	H	H	H	H	H	H	H	H
	chr11	13776972	T	A	1430.47	IR26 specific	A	A	B	A	A	A	A	H	H	H	H	H	H	AH	H	H	A	H	H	H	H	H
	chr11	16074113	G	A	973.899	IR26 specific	A	A	B	A	A	A	A	H	H	H	H	H	H	H	H	H	H	AH	H	H	H	H
	chr11	16330968	G	A	1206.42	IR26 specific	A	A	B	A	A	A	A	H	H	H	H	H	H	H	H	H	H	H	H	H	H	H
	chr11	16929325	A	G	2868.52	IR26 specific	A	A	B	A	A	A	A	H	H	H	H	H	H	H	H	H	H	H	H	H	H	H
	chr11	16929402	T	C	2767.35	IR26 specific	A	A	B	A	A	A	A	H	H	H	H	H	H	H	H	H	H	H	H	H	H	H
	chr11	17076764	C	T	674.729	IR26 specific	A	A	B	A	A	A	A	AH	AH	H	H	H	H	H	H	AH	H	A	H	H	AH	H
	chr11	17076812	G	T	674.45	IR26 specific	A	A	B	A	A	A	A	AH	AH	H	H	H	H	H	H	AH	H	A	H	H	AH	H
	chr11	17076817	A	C	674.448	IR26 specific	A	A	B	A	A	A	A	AH	AH	H	H	H	H	H	H	AH	H	A	H	H	AH	H
	chr11	17076836	T	A	674.461	IR26 specific	A	A	B	A	A	A	A	AH	AH	H	H	H	H	H	H	AH	H	A	H	H	AH	H
	chr11	17076841	G	A	674.46	IR26 specific	A	A	B	A	A	A	A	AH	AH	H	H	H	H	H	H	AH	H	A	H	H	AH	H
	chr11	19104508	A	G	704.536	IR26 specific	A	A	B	A	A	A	A	H	H	H	H	AH	AH	AH	H	H	H	H	H	AH	AH	AH
	chr11	19104576	G	A	791.696	IR26 specific	A	A	B	A	A	A	A	H	H	AH	H	AH	H	AH	H	AH	H	H	H	AH	AH	AH
	chr11	20835682	A	G	1022.66	IR26 specific	AH	A	B	AH	A	A	AH	AH	AH	H	AH	H	H	H	AH	AH	AH	H	H	AH	H	H
	chr11	24739162	G	A	816.403	IR26 specific	A	A	B	A	A	A	A	H	H	AH	H	H	AH	AH	H	H	H	H	AH	H	H	H
	chr11	25387662	G	A	1269.91	IR26 specific	A	A	B	A	A	A	A	AH	H	H	H	H	H	H	H	H	AH	AH	H	H	H	H
	chr11	25387682	C	T	1282.76	IR26 specific	A	A	B	A	A	A	A	AH	H	H	H	H	H	H	H	H	AH	AH	H	H	H	H
	chr11	26048564	G	A	2053.36	IR26 specific	A	A	B	A	A	A	A	H	H	H	H	H	H	H	H	H	H	H	H	H	H	H
	chr12	120168	T	C	449.601	IR26 specific	A	A	B	A	A	A	A	A	A	A	A	A	A	A	H	AH	H	H	H	AH	H	AH
	chr12	130488	G	A	210.467	IR26 specific	A	A	B	A	A	A	A	A	A	A	A	A	A	A	H	H	H	A	H	H	H	AH
	chr12	294966	C	T	785.877	IR26 specific	A	A	B	A	A	A	A	A	A	A	A	A	A	A	H	H	H	H	H	H	H	H
	chr12	295064	C	T	1504.67	IR26 specific	A	A	B	A	A	A	A	A	A	A	A	A	A	A	H	H	H	H	H	H	H	H
	chr12	7281938	C	T	1423.24	IR26 specific	A	A	B	A	A	A	A	H	H	H	H	H	H	H	H	H	H	H	H	H	H	H
	chr12	7369810	G	T	319.273	IR26 specific	A	A	B	A	A	A	A	AH	AH	H	AH	AH	AH	AH	AH	AH	AH	H	AH	H	AH	AH
	chr12	10321502	T	A	713.761	IR26 specific	A	A	B	A	A	A	A	AH	H	H	AH	H	AH	H	H	H	H	H	AH	H	H	H
	chr12	12670806	G	A	324.701	IR26 specific	A	A	B	A	A	A	A	H	H	AH	H	AH	AH	H	AH	H	H	AH	H	H	H	AH
	chr12	12834859	G	C	3465.41	IR26 specific	A	A	B	A	A	A	A	H	H	H	H	H	H	H	H	H	H	H	H	H	H	H
	chr12	14889865	T	C	1419.96	IR26 specific	A	A	B	A	A	A	A	H	H	H	H	H	H	H	H	H	H	H	H	H	H	H
	chr12	16556390	G	A	1454.72	IR26 specific	A	A	B	A	A	A	A	H	H	H	H	H	H	H	H	H	H	H	H	H	H	H
	chr12	16556452	T	A	3133.85	IR26 specific	AH	A	B	A	A	A	A	H	H	H	H	H	H	H	H	H	H	H	H	H	H	H
	chr12	17566517	G	A	668.938	IR26 specific	A	A	B	A	AH	A	A	H	H	H	AH	H	H	H	H	H	H	H	H	H	H	H
	chr12	20919633	G	A	3683.94	IR26 specific	A	A	B	A	A	A	A	H	H	H	H	H	H	H	H	H	H	H	H	H	H	H
	chr12	22590820	T	C	2545.09	IR26 specific	A	A	B	A	A	A	A	H	H	H	H	H	H	H	H	H	H	AH	H	H	H	H
	chr12	22615887	C	T	2479.63	IR26 specific	A	A	B	A	A	A	A	H	H	AH	H	H	H	H	H	H	H	H	H	H	H	H
	chr01	35132968	G	A	466.392	T65 specific	A	A	A	B	A	A	A	H	H	AH	H	H	AH	H	H	H	AH	H	AH	H	AH	H
	chr02	5768677	G	A	874.114	T65 specific	A	A	A	B	A	A	A	H	AH	H	AH	H	H	H	H	AH	H	AH	H	AH	AH	AH
	chr02	24132335	G	A	3953.59	T65 specific	A	A	A	B	A	A	A	BH	H	H	H	H	H	H	H	BH	BH	H	H	H	H	H
	chr03	15094254	G	A	3222.3	T65 specific	A	A	A	B	A	A	A	H	H	H	H	H	H	H	H	H	H	H	H	H	H	H
	chr05	3671668	C	T	1549.01	T65 specific	A	A	A	B	A	A	A	H	H	H	H	H	H	H	AH	H	H	H	H	H	H	H
	chr07	11455308	G	A	3792.8	T65 specific	A	A	A	B	A	A	A	H	H	H	H	H	H	H	H	H	H	H	H	H	H	H
	chr07	11455328	C	T	3792.86	T65 specific	A	A	A	B	A	A	A	H	H	H	H	H	H	H	H	H	H	H	H	H	H	H
	chr07	18586407	T	C	245.561	T65 specific	A	A	A	B	A	A	A	A	AH	H	AH	AH	AH	H	A	A	A	H	H	AH	AH	AH
	chr07	19606002	C	T	2829.65	T65 specific	A	A	A	B	A	A	A	H	H	H	H	H	H	H	H	H	H	H	H	H	H	H
	chr07	21324318	A	C	1793.11	T65 specific	A	A	A	B	A	A	A	H	H	H	H	H	H	H	H	H	H	H	H	H	H	H
	chr11	5650978	G	A	537.47	T65 specific	A	A	A	BH	A	A	A	H	H	AH	AH	H	H	AH	AH	H	AH	H	AH	H	AH	AH

## Sheet: Table S2
	Supplementary Table S2. Cultivation periods of rice plants in this study.
	Variety name	Abbreviation	Plant number	Planting date (filed cultivation)	Harvest date
	Nipponbare	NP	3	2025-05-01	2025-09-26
	Kasalath	KS	3	2025-05-01	2025-09-11
	IR26	IR	3	2025-05-01	2025-09-30
	Taichung 65	T65	3	2025-05-01	2025-09-30
	Nipponbare tetraploid	NPx4	4	2025-05-19	2025-09-26
	Quad (tetraparental hybrid)	Quad	15	2025-06-30	2025-09-26
	NPxKS hybrid tetraploid	NPKS	3	2025-06-30	2025-09-26

## Sheet: Table S3
	Supplementary Table S3. Medium composition in this study.
		Reference	Uchiumi et al., 2007			Shimizu-Sato et al., 2020
		Purpose	Zygote and embryo cultivation	NP callus shoot induction	NP root induction	Wild rice pre-regeneration	Wild rice regeneration	Wild rice root induction
		Medium name	N6Z	RE-III	HF	modified NBPRC	modified RNM	modified MSI
	Major salts
	KNO3	Potassium Nitrate		1900	1900	2830	2830	950
	(NH4)2SO4	Ammonium Sulfate				463	463
	NH4NO3	Ammonium Nitrate		1650	1650			825
	CaCl2･2H2O	Calcium Chloride Dihydrate		370	370	166	166	220
	MgSO4･7H2O	Magnesium Sulfate Heptahydrate		440	440	185	185	185
	KH2PO4	Potassium Dihydrogen Phosphate		170	170	400	400	85
	Chelator
	FeSO4･7H2O	Iron(II) Sulfate Heptahydrate		27.8	27.8	27.8	27.8	27.8
	Na2EDTA	Ethylenediamine-N,N,N',N'-tetraacetic Acid Disodium Salt Dihydrate (2NA)		37.3	37.3	37.3	37.3	37.3
	Minor salts
	MnSO4･4H2O	Manganese(II) sulfate tetrahydrate		22.3	22.3	13.2	13.2	22.3
	ZnSO4･7H2O	Zinc Sulfate Heptahydrate		8.6	8.6	2	2	8.6
	CuSO4･5H2O	Copper(II) Sulfate Pentahydrate		0.025	0.025	2.525	0.025	0.025
	Na2MoO4･2H2O	Sodium molybdate dihydrate		0.25	0.25	0.25	0.25	0.25
	CoCl2･6H2O	Cobalt(II) Chloride Hexahydrate		0.025	0.025	0.025	0.025	0.025
	H3BO3	Boric Acid		6.2	6.2	3	3	6.2
	KI	Potassium Iodide		0.83	0.83	0.8	0.8	0.83
	Vitamins
	Thiamine HCl	Thiamin Hydrochloride/Vitamin B1		1	1	10	10	1
	Pyridoxine HCl	Pyridoxine Hydrochloride/ Vitamin B6		0.5	0.5	1	1	0.5
	Nicotinic acid	Nicotinic acid/Vitamin B3		0.5	0.5	1	1	0.5
	Glycine	Glycine		2	2			10
	myo-Inositol	myo-inositol		100	100	100	100	100
	Hormone
	2, 4-D	2,4-Dichlorophenoxyacetic acid				2
	NAA	1-Naphthylacetic Acid/NAA		0.02		1	1
	IBA	4-(3-Indolyl)butyric Acid						0.2
	Kinetin	6-Furfurylaminopurine/Kinetin		2
	BAP/BA/6BA	6-Benzylaminopurine/6-Benzyladenine				1	3
	Carbon souse
	Sucrose	Sucrose		30000	30000			15,000
	Sorbitol	D(-)-Sorbitol		30000
	Maltose	Maltose Monohydrate				30000	30000
	Amino acid
	Casamino acid	Tryptone/Casein hydrolysate/Casamino acid		2000		500	300	1,000
	Proline	L(-)-Proline				500	300
	Glutamine	L(+)-Glutamine				500	300	1000
	Aspartic acid	L-Aspartic Acid						250
	Asparagine	L-Asparagine Monohydrate						200
	Other
	Gelrite	Gelrite		4000	4000	5000	4000	3,000
	pH		pH	pH 5.8	pH 5.8	pH 5.8	pH 5.8	pH 5.8
	Media composition is given in (g/L). NBPRC, RNM and MSI (Shimizu-Sato et al., 2020) were minor modified in this study.

## Sheet: Table S4
	Supplementary Table S4. Primer sequences used in the two-step PCR.
	1st PCR			2nd PCR			Index sequence
	Primer name	Sequence [5’→3’]		Primer name	Sequence [5’→3’]		Sample name	Forward (Index2)	Reverse (Index1)
	NE10_301	TAAGAGACAGAAA		2ndF	Phos-AATGATACGGCGACCACCGAGATCTACAC-Index2-TCGTCGGCAGCGTCAGATGTGTATAAGAGACAG		NP-2	CTATGTAG	GATATCAT
	NE10_302	TAAGAGACAGAAC		2ndR	CAAGCAGAAGACGGCATACGAGAT-Index1-GTCTCGTGGGCTCGGAGATGTGTATAAGAGACAG		T65-2	CTCGACAG	CAGCTCAT
	NE10_303	TAAGAGACAGAAG					KS-2	TCACTGCA	CTGTATAG
	NE10_304	TAAGAGACAGAAT					IR-2	ACAGCGTA	TATAGTCT
	NE10_305	TAAGAGACAGACA					NPKS-4-1	GTGTCAGT	CTCATACG
	NE10_306	TAAGAGACAGACC					NPKS-4-2	GTACGCAT	CTATGACA
	NE10_307	TAAGAGACAGACG					NPKS-4-3	GTGCGACG	TACGAGAT
	NE10_308	TAAGAGACAGACT					Quad-4-1	GAGTACAG	CTCACGTG
	NE10_309	TAAGAGACAGAGA					Quad-4-2	TATACTGA	TCGTAGCA
	NE10_310	TAAGAGACAGAGC					Quad-4-3	GAGCTATG	CTATGTGT
	NE10_311	TAAGAGACAGAGG					Quad-4-4	CATGTACA	CTCGTCAT
	NE10_312	TAAGAGACAGAGT					Quad-4-5	TACTCGCT	CTGTCTCA
	NE10_313	TAAGAGACAGATA					Quad-4-6	AGCGTCGA	CTGAGATA
	NE10_314	TAAGAGACAGATC					Quad-4-7	TGCATAGA	CTGATCTG
	NE10_315	TAAGAGACAGATG					Quad-4-8	CTATGTAG	CAGTCGTC
	NE10_316	TAAGAGACAGATT					Quad-4-9	CTCGACAG	GCGTCGCT
	NE10_317	TAAGAGACAGCAA					Quad-4-10	TCACTGCA	TATCTACG
	NE10_318	TAAGAGACAGCAC					Quad-4-11	ACAGCGTA	GATCTATC
	NE10_319	TAAGAGACAGCAG					Quad-4-12	AGTCATCA	TGTCGACT
	NE10_320	TAAGAGACAGCAT					Quad-4-13	CGTCAGTA	GTCATAGT
	NE10_321	TAAGAGACAGCCA					Quad-4-14	CACTGTGT	TATGCTGA
	NE10_322	TAAGAGACAGCCC					Quad-4-15	GTGTCAGT	CTAGCAGA
	NE10_323	TAAGAGACAGCCG
	NE10_324	TAAGAGACAGCCT
	NE10_325	TAAGAGACAGCGA
	NE10_326	TAAGAGACAGCGC
	NE10_327	TAAGAGACAGCGG
	NE10_328	TAAGAGACAGCGT
	NE10_329	TAAGAGACAGCTA
	NE10_330	TAAGAGACAGCTC
	NE10_331	TAAGAGACAGCTG
	NE10_332	TAAGAGACAGCTT
